# Supplementary material for: The rosetteless gene controls development in the choanoflagellate S. rosetta
Source: eLife. 2014 Oct 9;3:e04070. doi: 10.7554/eLife.04070 (PMC4381721; doi:10.7554/eLife.04070)
Supplement: Figure 4—source data 1. — For each isolated progeny of the cross, we provide the phenotype when grown in HN media (chains or rosettes), the identity of the heterozygous flask from which the haploid isolate was derived (‘Flask isolated from’), and the genotypes at 60 SNV and microsatellite loci. For the microsatellite loci, numbers indicate the approximate size of the amplicon. Missing genotype data is indicated by ‘NA’. Color-coding shows genotypes and phenotypes that match Isolate B (white) or Rosetteless (yellow). Genotyping data was used to construct a linkage map for S. rosetta (Figure 4—figure supplement 3). For each marker, we list its linkage group and its inferred position within the linkage group. Four of the cross isolates were excluded from further analyses because their genotypes were identical to other cross isolates. DOI: http://dx.doi.org/10.7554/eLife.04070.010 [file elife04070s001.xlsx]

## Sheet: Genotype data
Fig. 4-- source data 1. Genotypes of all cross progeny and assignment to linkage groups
white = Isolate B allele/phenotype
yellow = Rosetteless allele/phenotype
A, T, C, or G indicates the SNV allele present
Numbers indicate the size of the microsatellite amplicon detected
NA indicates missing data
Y3F8 was excluded from all analyses because it was identical to Y2A5
Similarly, Y3F11 was identical to Y2C4, Y5B7 was identical to Y4C7, and Y4A3 was identical to Y5E2. All duplicate progeny were excluded.
Linkage group number			9	9	2	2	2	2	2	10	10	5	19	20	1	1	1	1	1	1	3	3	3	3	21	22	6	6	23	18	18	11	12	12	24	4	4	4	7	7	7	25	26	13	13	17	17	14	8
Linkage group order			1	2	1	2	3	4	5	1	2	3	1	1	1	2	3	4	5	6	1	2	3	4	1	1	1	2	1	1	2	1	2	1	1	2	3	4	3	2	1	1	1	1	2	1	2	1	2
Cross progeny	Flask isolated from	Phenotype	sc001_02, sc1: 401320	sc001_03, sc1: 979131	sc002_02, sc2: 780731	sc002_03, sc2: 1282949	sc002_04, sc2: 1595442	gt_indel_7, sc2: 1730188	sc002_06, sc2: 1810508	sc003_06, sc3: 1291000	sc003_08, sc3: 1489722	sc004_01, sc4: 172055	sc005_03, sc5: 1276357	sc006_03, sc6: 1658977	sc007_01, sc7:138815	sc007_02, sc7: 405691	sc007_03, sc7: 702151	gt_indel_2, sc7: 855120	sc007_07, sc7: 934164	sc007_08, sc7: 1879105	gt2, sc8: 427804	sc008_01, sc8: 1005930	gt_indel_9, sc8: 1073581	sc008_04, sc8: 1430400	sc009_05, sc9: 1372142	sc011_02, sc11: 1098842	sc014_03, sc14: 463971	sc014_07, sc14: 1181348	sc015_03, sc15: 246272	sc018_04, sc18: 362146	sc018_10, sc18: 1381402	sc019_03, sc19: 350005	sc020_05, sc20: 427369	sc020_06, sc20: 800101	sc021_01, sc21: 76320	sc022_03, sc22: 250176	sc022_07, sc22: 401818	gt3, sc22: 1,229,741	sc023_03, sc23: 396420	sc023_06, sc23: 602502	sc023_08, sc23: 879985	sc026_02, sc26: 283024	sc027_01, sc27: 149724	sc028_01, sc28: 135001	sc028_04, sc28: 301740	sc029_03, sc29: 66009	sc029_10, sc29: 802269	sc034_03, sc34: 495763	sc035_01, sc35: 36915
Y5E8	X2B12.D	chains	G	C	G	C	A	171	T	C	T	C	C	A	T	G	C	NA	C	A	G	C	467	C	C	C	C	T	G	C	G	G	T	C	T	A	A	G	NA	T	G	G	NA	G	G	G	T	C	C
Y4A4	X2B12.D	chains	T	T	G	C	C	171	T	A	G	C	T	A	T	G	C	267	C	G	G	C	484	A	T	G	A	T	C	T	NA	G	C	C	C	G	G	A	NA	T	G	G	NA	C	A	A	C	C	T
Y4G2	X2B12.A	chains	T	T	G	T	C	171	T	C	T	C	T	A	T	G	C	267	C	A	G	C	484	C	C	G	C	T	C	T	G	G	T	C	T	G	G	G	A	C	A	G	A	G	G	G	T	C	C
Y5C5	X2B12.A	chains	T	C	A	T	C	171	T	A	G	C	T	G	C	C	T	267	T	A	G	C	484	C	C	C	C	C	C	C	G	G	T	T	T	G	G	A	A	T	G	A	A	NA	A	A	C	C	NA
Y5D5	X2B12.C	chains	G	C	A	T	C	171	T	C	T	T	T	G	C	C	T	285	T	G	G	C	484	C	C	G	C	C	C	T	NA	A	C	C	C	G	G	G	A	C	A	A	NA	G	G	NA	C	G	T
Y5B1	X2B12.F	chains	T	T	A	T	C	171	NA	C	T	C	C	NA	NA	C	T	285	T	G	G	C	484	C	C	G	C	T	C	C	G	A	T	T	NA	G	G	NA	NA	T	G	A	A	G	NA	A	NA	G	T
Y1G3	X1F4.2	chains	T	C	A	T	C	171	T	A	G	C	T	G	C	C	T	285	T	G	G	C	484	C	T	G	A	C	C	T	G	G	T	T	T	G	G	G	G	T	G	G	G	C	A	G	T	G	T
Y4C10	X2B12.C	chains	G	NA	G	C	C	171	NA	A	G	NA	T	A	NA	C	T	285	T	A	G	C	484	NA	T	C	A	C	NA	NA	NA	NA	C	C	C	A	A	G	NA	C	A	NA	NA	C	NA	G	T	C	T
Y5C3	X2B12.A	chains	G	C	G	C	A	171	T	A	G	T	T	G	C	C	C	NA	C	G	G	C	484	C	T	G	A	C	C	T	G	A	C	C	T	A	A	A	NA	T	G	G	NA	G	G	A	T	G	NA
Y4D4	X2B12.B	chains	G	C	G	C	A	171	NA	NA	G	T	T	NA	NA	C	T	NA	T	A	G	C	484	C	NA	NA	C	T	G	T	NA	NA	C	C	T	A	A	A	A	NA	A	NA	A	G	G	NA	NA	G	NA
Y4B10	X2B12.D	chains	T	T	G	C	A	171	T	C	G	T	C	G	T	G	C	NA	C	G	G	C	484	C	T	G	A	NA	C	T	NA	G	T	C	C	A	A	G	NA	T	G	G	NA	C	A	A	T	C	T
Y4E2	X2B12.C	chains	G	C	G	C	A	188	C	C	T	T	T	G	NA	G	C	267	C	G	G	C	484	C	T	G	A	T	C	T	A	G	T	T	C	G	G	A	NA	T	A	G	A	G	G	A	C	G	C
Y4D2	X2B12.B	chains	G	C	G	C	A	188	C	A	G	T	T	G	T	G	C	267	C	G	G	C	484	C	T	G	C	T	C	T	NA	G	C	C	T	G	G	A	NA	T	G	A	A	G	G	G	T	C	C
Y4D1	X2B12.D	chains	G	T	G	T	A	188	NA	C	NA	T	C	A	T	G	C	267	NA	G	G	C	484	C	T	G	A	NA	C	C	A	G	C	C	NA	A	A	G	A	C	A	A	A	G	NA	NA	C	C	C
Y4C2	X2B12.D	chains	T	C	A	C	A	188	C	C	T	T	C	G	C	G	C	267	C	A	G	C	484	C	C	C	A	C	G	C	NA	A	C	C	C	A	A	A	NA	T	G	A	A	C	A	A	C	C	T
Y5B5	X2B12.E	chains	G	C	G	C	A	188	C	C	T	T	T	G	C	C	C	267	C	G	G	C	484	C	T	C	A	C	C	C	NA	G	T	T	C	A	A	A	NA	C	G	A	NA	G	G	G	C	C	T
Y5C1	X2B12.E	chains	G	C	G	C	A	188	C	A	G	T	T	G	C	C	C	267	C	G	G	C	484	C	C	G	C	T	C	T	NA	NA	T	T	C	A	NA	A	A	C	A	G	A	C	A	G	C	G	NA
Y1H11	X1H8.2	chains	T	T	A	C	A	188	C	A	T	T	C	G	T	G	C	267	C	G	G	C	484	C	T	C	C	C	C	T	G	A	C	C	T	G	G	A	A	C	A	G	A	C	G	G	T	C	C
Y4C5	X2B12.C	chains	T	C	A	T	C	188	C	A	G	C	C	G	C	C	T	267	T	G	G	C	484	C	C	C	A	T	C	T	G	G	T	T	T	A	A	G	A	C	A	A	A	C	A	A	C	G	T
Y5C11	X2B12.C	chains	G	C	G	T	A	188	NA	C	T	C	T	A	T	G	C	267	C	A	G	C	484	C	C	G	C	T	G	T	NA	G	T	T	C	G	A	G	A	C	A	A	NA	C	NA	A	C	G	NA
Y5E2	X2B12.D	chains	G	C	G	C	A	188	C	A	G	C	C	G	NA	G	C	267	C	A	G	C	484	C	T	C	A	C	G	T	G	G	C	C	T	G	A	A	NA	T	G	A	A	G	G	NA	NA	G	T
Y4A3 (same as Y5E2)	X2B12.D	chains	G	C	G	C	A	188	NA	A	G	NA	C	NA	NA	G	C	267	C	A	G	C	484	C	T	C	A	C	G	T	G	G	C	C	NA	G	A	NA	NA	T	G	A	A	G	NA	NA	T	G	NA
Y4B7	X2B12.C	chains	T	C	G	C	A	188	C	A	G	C	T	A	T	G	T	267	T	A	G	C	484	C	C	C	A	T	G	C	NA	A	T	T	C	A	A	A	A	C	A	G	A	C	A	G	T	C	T
Y5A5	X2B12.C	chains	T	T	G	C	A	188	C	A	G	C	T	A	C	C	C	267	C	A	G	C	484	C	T	C	C	T	G	T	NA	G	T	NA	T	G	G	G	NA	T	G	A	A	G	G	A	T	C	T
Y4D9	X2B12.B	chains	T	T	A	T	C	188	C	A	G	C	C	G	C	C	C	267	C	A	G	C	484	C	T	G	A	C	G	T	NA	G	C	C	C	A	A	A	NA	C	A	G	NA	C	A	G	C	G	T
Y4E5	X2B12.F	chains	G	T	A	C	A	188	C	A	G	C	T	NA	T	G	C	267	C	A	G	C	484	C	C	C	C	C	G	T	NA	G	NA	T	NA	A	A	NA	A	T	G	NA	NA	G	NA	G	C	G	T
Y4F8	X2B12.F	chains	T	C	G	C	A	188	C	C	T	C	T	A	C	G	C	267	C	G	G	C	484	C	C	C	A	C	C	C	NA	G	T	C	T	A	A	G	A	C	A	A	A	C	A	A	C	G	C
Y4H4	X2B12.D	chains	G	T	G	C	A	188	C	A	G	C	T	A	NA	G	C	267	C	G	G	C	484	C	T	G	C	C	C	C	A	G	C	C	T	G	G	G	A	T	G	G	A	C	G	G	NA	G	T
Y4E3	X2B12.B	chains	T	T	G	C	A	188	NA	C	T	NA	T	G	C	C	C	267	NA	G	G	C	484	C	T	G	A	C	C	NA	NA	G	C	C	T	G	G	NA	NA	T	G	A	NA	C	A	A	T	C	C
Y4G3	X2B12.A	chains	T	C	G	C	A	188	C	A	G	C	T	G	C	C	T	267	C	A	G	C	484	C	T	G	C	C	C	C	G	G	T	T	T	A	A	G	NA	T	G	A	NA	G	NA	A	T	C	T
Y5C2	X2B12.A	chains	T	T	G	C	A	188	C	C	NA	NA	T	NA	T	G	C	267	T	A	G	C	484	C	T	C	A	T	C	NA	NA	G	C	C	C	A	A	G	NA	C	A	G	NA	G	NA	A	NA	G	NA
Y4C11	X2B12.C	chains	T	C	A	T	C	188	C	A	G	T	C	NA	NA	C	T	285	C	G	G	C	484	A	C	C	C	NA	G	C	NA	A	C	C	T	G	G	G	NA	T	G	G	A	NA	G	G	T	C	T
Y4C7	X2B12.C	chains	G	C	A	C	A	188	C	A	G	T	T	A	T	G	C	285	C	A	G	C	484	C	T	C	C	T	C	T	A	G	C	C	T	A	A	G	A	C	A	G	NA	G	G	A	C	G	T
Y4E10	X2B12.F	chains	G	C	G	C	A	188	C	A	NA	T	C	G	NA	C	T	285	T	A	G	C	484	C	C	C	C	T	G	C	G	G	C	C	T	A	G	G	NA	T	G	G	A	C	A	G	T	C	C
Y4C9	X2B12.C	chains	T	T	G	C	A	188	C	A	G	T	T	A	T	C	T	285	T	G	G	C	484	C	T	G	C	T	C	T	G	G	T	T	T	G	G	G	NA	T	G	G	NA	G	G	G	T	C	C
Y1G8	X1H8.1	chains	G	T	A	C	A	188	C	A	G	T	T	A	C	C	T	285	T	A	G	C	484	C	C	G	A	C	C	C	G	A	C	C	T	A	A	A	A	C	G	G	A	G	G	G	C	G	C
Y4A9	X2B12.E	chains	T	T	A	T	A	188	C	C	T	T	T	A	T	G	C	285	C	G	G	C	484	C	C	G	C	C	G	C	G	G	T	T	T	A	A	A	A	C	A	G	A	G	G	A	C	C	T
Y1G11	X1H8.1	chains	G	T	A	C	A	188	C	A	T	C	T	A	C	C	T	285	T	G	G	C	484	C	C	G	A	T	C	C	A	G	C	T	T	A	A	G	G	T	G	A	A	G	G	G	T	G	C
Y4H3	X2B12.D	chains	G	C	G	C	A	188	C	A	G	C	T	G	NA	G	C	285	NA	A	G	C	484	C	C	C	A	T	C	T	NA	G	T	C	T	A	A	G	A	C	A	G	NA	NA	G	A	T	C	T
Y4C12	X2B12.C	chains	T	C	G	C	A	188	NA	A	G	C	T	A	NA	C	T	285	T	G	G	C	484	C	T	C	C	T	NA	NA	G	G	T	C	C	A	A	NA	NA	T	NA	A	NA	NA	G	A	C	C	T
Y5E3	X2B12.D	chains	T	T	G	NA	NA	188	NA	C	G	C	T	NA	NA	C	T	285	T	NA	G	C	484	C	C	NA	NA	T	G	T	G	G	T	T	NA	G	G	NA	NA	NA	NA	G	A	NA	NA	G	T	C	C
Y4E11	X2B12.F	chains	G	T	G	C	A	188	C	A	G	NA	T	G	C	C	C	285	C	A	G	C	484	NA	C	C	A	T	C	C	G	G	T	T	C	G	G	G	A	T	G	G	NA	G	G	NA	C	G	C
Y5B7 (same as Y4C7)	X2B12.C	chains	G	C	A	C	A	188	C	A	G	T	T	A	T	G	C	NA	C	A	G	C	484	C	T	C	C	T	C	T	NA	G	C	C	T	A	A	G	A	C	A	G	NA	G	G	A	C	G	T
Y5A6	X2B12.C	chains	T	C	A	T	A	188	C	C	G	T	C	G	T	G	C	NA	C	G	G	C	484	C	C	G	C	T	G	C	G	A	T	T	T	G	G	G	A	T	G	G	NA	G	G	G	T	G	C
Y5C4	X2B12.A	chains	T	T	G	C	A	188	C	A	G	C	C	G	C	C	T	NA	T	A	G	C	484	C	C	C	C	C	C	T	G	G	T	T	C	A	A	A	A	C	A	G	NA	G	G	A	C	G	T
Y4A12	X2B12.E	chains	G	C	G	C	A	188	C	C	T	C	T	NA	T	G	T	NA	T	A	G	C	484	C	C	G	C	C	G	T	NA	G	C	C	NA	A	A	A	A	C	A	G	NA	G	NA	G	T	G	C
Y4H7	X2B12.D	chains	G	C	A	T	A	188	C	C	T	C	NA	G	C	C	T	NA	T	A	G	C	484	C	C	C	C	T	C	T	NA	G	C	C	T	A	A	G	NA	T	G	A	A	G	G	G	C	C	T
Y5E10	X2B12.B	chains	G	C	G	C	NA	188	C	NA	T	C	T	NA	NA	NA	C	NA	T	A	G	C	484	C	C	G	C	T	C	C	NA	G	C	C	NA	G	G	A	A	C	G	NA	A	G	G	NA	NA	C	T
Y5A9	X2B12.D	chains	T	T	G	C	A	188	C	C	T	C	C	A	T	G	C	NA	C	G	G	C	484	C	T	G	A	C	G	C	G	G	T	T	C	A	A	A	NA	T	G	A	NA	G	G	G	T	G	C
Y4B12	X2B12.D	chains	G	C	A	C	A	188	C	C	T	T	T	G	T	C	T	NA	T	G	G	C	484	C	T	G	C	C	C	C	G	G	T	T	C	G	G	NA	A	C	G	A	NA	G	G	A	C	G	T
Y5D4	X2B12.D	chains	G	C	G	C	A	188	C	C	T	C	C	G	NA	C	T	285	T	G	G	C	NA	C	C	G	A	C	C	T	NA	G	T	T	NA	A	A	NA	NA	T	G	A	A	G	NA	NA	T	C	T
Y5D6	X2B12.C	chains	G	T	A	C	A	NA	NA	C	T	T	T	A	C	G	C	NA	C	A	G	C	NA	A	C	C	C	T	C	T	A	A	T	C	C	A	NA	NA	A	C	A	NA	NA	G	NA	A	T	G	C
Y4E12	X2B12.F	chains	T	T	G	T	C	171	NA	C	T	T	T	NA	T	G	C	285	C	NA	G	NA	467	C	C	NA	NA	C	G	C	A	G	T	C	T	G	NA	NA	A	C	A	G	A	G	NA	NA	NA	G	NA
Y5D9	X2B12.D	chains	T	C	G	C	C	171	NA	NA	G	C	C	A	NA	C	T	NA	T	NA	G	NA	484	C	T	G	C	T	C	NA	NA	NA	T	T	C	A	A	A	NA	T	NA	A	NA	G	NA	G	T	C	C
Y4B2	X2B12.E	chains	G	C	G	C	A	188	C	C	T	T	T	A	T	G	C	267	C	G	G	NA	484	C	T	C	C	T	G	C	G	G	C	C	T	G	G	A	NA	T	G	G	NA	C	A	A	C	G	T
Y4G9	X2B12.A	chains	G	C	A	T	C	171	T	A	G	T	T	A	T	G	C	267	C	G	G	T	467	A	C	C	A	T	G	C	G	G	C	C	T	A	A	G	A	C	A	A	NA	C	A	A	C	NA	T
Y1D2	X2B12.1	chains	T	T	A	T	C	171	T	A	G	T	T	G	C	G	C	267	C	G	G	T	467	A	C	C	A	C	G	C	G	G	C	C	T	G	G	A	G	T	G	A	G	C	A	A	C	C	T
Y4H6	X2B12.D	chains	G	C	A	T	C	171	NA	A	G	T	T	A	T	G	C	267	C	A	G	T	467	A	T	G	C	T	C	T	G	G	T	T	C	G	G	A	A	T	G	G	NA	G	G	G	NA	C	NA
Y4B3	X2B12.F	chains	T	T	A	T	C	171	C	C	T	T	T	A	NA	C	T	267	T	A	G	T	467	A	C	C	C	T	G	T	G	G	C	C	T	A	A	G	A	C	A	A	NA	C	G	A	T	C	C
Y4G6	X2B12.A	chains	G	C	G	C	C	171	T	A	G	T	C	A	T	G	C	267	C	G	G	T	467	A	T	G	A	C	C	T	G	G	T	T	T	G	G	A	A	C	A	G	NA	C	A	G	T	C	C
Y4H1	X2B12.A	chains	G	T	A	T	C	171	T	A	G	T	T	G	C	C	T	267	C	A	G	T	467	A	T	G	A	C	G	T	G	G	C	NA	NA	G	G	NA	A	C	A	A	A	C	NA	NA	C	C	NA
Y4D11	X2B12.C	chains	T	T	G	T	C	171	T	A	G	C	T	A	T	G	C	267	C	A	G	T	467	A	C	C	C	T	C	C	NA	G	T	T	C	A	A	G	NA	T	A	A	NA	C	A	A	C	G	T
Y4G11	X2B12.A	chains	G	T	G	T	C	171	T	NA	G	C	T	G	T	G	C	267	C	A	G	T	467	A	T	C	C	T	C	C	G	G	T	C	T	A	A	G	A	C	A	A	A	G	G	G	C	C	T
Y4G4	X2B12.A	chains	G	T	A	T	C	171	T	C	T	C	T	G	T	G	C	267	C	G	G	T	467	A	T	C	C	T	G	T	G	G	C	C	NA	G	G	G	A	C	A	A	NA	G	G	NA	T	C	T
Y4F1	X2B12.F	chains	T	C	G	C	A	171	T	C	T	C	T	G	T	G	C	267	C	G	G	T	467	A	T	G	A	C	C	C	G	G	C	C	NA	G	G	G	NA	T	A	G	A	G	A	G	T	C	T
Y4H5	X2B12.D	chains	T	T	A	T	C	171	T	A	G	C	C	G	T	G	C	267	C	A	G	T	467	A	C	G	C	T	G	C	NA	G	C	T	C	G	G	G	A	C	A	G	NA	G	G	G	T	C	NA
Y4H11	X2B12.A	chains	G	C	A	T	C	171	NA	A	G	T	C	A	T	G	C	267	C	A	G	T	467	C	C	G	A	C	C	C	G	G	T	T	C	A	A	G	NA	T	G	G	NA	G	A	A	C	G	T
Y4E6	X2B12.F	chains	T	T	G	T	C	171	T	C	T	C	C	G	C	C	T	267	C	G	G	T	467	C	C	G	A	C	G	T	NA	A	C	C	T	G	G	A	NA	T	G	A	A	C	A	A	T	C	NA
Y1B10	X4G10.3	chains	T	T	A	T	C	171	NA	A	G	T	T	G	T	G	C	267	C	G	G	T	467	NA	C	G	NA	T	C	T	G	A	C	C	NA	A	A	A	A	C	A	A	NA	G	G	A	T	C	C
Y4E9	X2B12.F	chains	G	T	G	C	C	171	T	C	T	T	T	G	T	C	T	285	T	A	G	T	467	A	C	G	C	C	C	C	NA	G	C	C	C	G	G	A	A	C	A	G	A	C	A	A	C	G	T
Y4H10	X2B12.B	chains	G	C	G	C	A	171	T	C	G	C	C	G	C	C	T	285	T	G	G	T	467	A	C	G	A	T	C	T	NA	G	C	C	C	G	G	A	A	C	A	A	A	C	A	G	T	G	T
Y1F3	X1F4.1	chains	T	T	G	C	A	171	T	C	T	C	C	G	C	C	T	285	T	A	G	T	467	A	C	C	C	T	C	C	A	G	C	C	C	G	G	A	G	T	G	G	A	C	A	G	T	G	C
Y4F11	X2B12.F	chains	T	T	G	T	C	171	T	C	T	C	T	A	T	G	C	285	C	G	G	T	467	A	T	C	C	T	G	C	G	G	T	C	T	A	A	A	NA	T	G	A	NA	C	A	A	T	C	C
Y5E1	X2B12.D	chains	G	C	A	T	C	171	T	C	T	C	C	G	T	C	T	285	T	G	G	T	467	A	T	C	C	T	C	T	G	G	T	T	C	A	A	A	A	C	A	G	A	C	A	G	T	G	T
Y4F12	X2B12.A	chains	T	C	A	T	C	171	T	C	NA	C	T	A	T	C	T	285	T	A	G	T	467	A	C	C	C	C	C	C	NA	G	C	C	C	G	G	NA	A	C	A	G	A	NA	A	G	NA	C	C
Y1E12	X1F4.1	chains	T	C	A	C	A	171	T	C	G	T	C	A	C	C	T	285	T	A	G	T	467	C	T	C	C	C	C	T	A	G	C	C	T	A	A	G	A	C	A	G	A	G	G	G	T	G	C
Y1H9	X1H8.2	chains	T	T	A	T	C	171	T	A	T	T	T	A	C	C	T	285	T	A	G	T	467	NA	T	C	C	T	G	NA	G	A	C	C	NA	A	A	A	A	C	NA	G	A	C	A	G	NA	C	NA
Y5D3	X2B12.B	chains	G	C	A	T	C	171	T	C	T	T	C	G	C	C	T	NA	T	G	G	T	467	A	T	C	A	C	C	C	NA	G	T	T	C	G	G	G	NA	T	G	G	A	C	A	G	T	G	T
Y5E7	X2B12.D	chains	G	C	G	T	C	171	T	C	T	C	T	G	T	C	C	NA	C	A	G	T	467	A	C	G	A	C	C	T	NA	G	C	T	T	G	G	G	A	C	A	G	A	G	G	G	C	G	T
Y4G12	X2B12.A	chains	T	T	G	C	A	171	T	A	G	C	C	G	T	G	C	NA	C	G	G	T	467	A	T	C	C	T	G	T	G	G	T	T	C	G	G	A	A	C	A	G	NA	C	A	A	T	C	C
Y5D10	X2B12.D	chains	NA	NA	NA	NA	NA	171	NA	A	NA	NA	T	A	NA	C	T	NA	T	NA	G	T	467	NA	C	C	NA	NA	C	NA	NA	G	T	T	NA	NA	G	NA	NA	NA	NA	G	NA	G	NA	NA	NA	NA	NA
Y5E9	X2B12.D	chains	T	T	G	NA	NA	171	NA	C	NA	C	NA	NA	NA	NA	C	NA	NA	G	G	T	467	NA	NA	G	NA	C	NA	NA	NA	NA	C	NA	C	G	G	NA	NA	NA	NA	G	NA	NA	NA	NA	NA	NA	C
Y1B3	X4G10.2	chains	T	T	G	C	A	188	C	C	T	T	C	A	C	G	C	267	C	A	G	T	467	A	T	C	C	T	C	C	G	G	T	T	C	A	A	A	G	C	A	G	A	G	G	G	T	G	T
Y5D12	X2B12.E	chains	G	T	A	T	C	188	C	C	T	T	C	NA	T	G	C	267	C	G	G	T	467	A	C	C	C	T	G	T	G	A	NA	C	T	G	G	A	NA	T	G	A	A	C	A	A	T	C	T
Y4A2	X2B12.D	chains	T	T	G	C	A	188	C	C	NA	T	T	G	T	G	T	267	C	A	G	T	467	A	T	C	A	T	G	NA	NA	A	C	C	C	A	A	A	NA	T	G	G	A	G	G	A	C	C	T
Y5B2	X2B12.F	chains	T	T	A	C	A	188	C	C	T	T	NA	G	T	G	C	267	C	A	G	T	467	A	T	G	C	T	C	T	G	A	T	T	T	G	G	G	A	C	A	A	A	NA	NA	G	T	C	T
Y4D6	X2B12.B	chains	T	T	G	C	A	188	C	A	G	T	C	A	T	G	C	267	C	G	G	T	467	A	C	C	C	T	C	T	NA	G	T	T	T	A	A	NA	NA	T	G	NA	NA	G	G	NA	C	C	T
Y5B10	X2B12.A	chains	T	T	G	C	A	188	C	C	T	T	T	G	T	G	C	267	C	G	G	T	467	A	T	C	A	C	G	T	NA	G	C	C	C	G	A	NA	NA	T	G	A	NA	G	G	A	C	C	T
Y4F2	X2B12.F	chains	G	C	G	C	A	188	C	C	T	T	C	A	T	G	C	267	C	G	G	T	467	A	C	C	A	C	G	T	NA	G	C	T	C	G	G	G	NA	T	G	A	A	G	G	A	T	C	C
Y5D1	X2B12.B	chains	T	T	G	C	A	188	NA	A	G	T	T	NA	NA	G	C	267	C	NA	G	T	467	A	C	C	NA	C	C	T	NA	A	C	C	NA	A	A	NA	NA	T	G	A	A	G	G	A	C	C	C
Y4C3	X2B12.D	chains	G	C	G	C	A	188	C	A	T	T	T	G	T	G	C	267	T	G	G	T	467	A	T	G	A	C	C	C	NA	G	C	C	T	G	G	A	A	C	A	G	A	G	G	A	C	C	C
Y4B6	X2B12.C	chains	T	C	A	C	A	188	C	A	G	C	T	G	T	G	C	267	C	A	G	T	467	A	T	G	C	T	G	C	NA	G	T	T	C	A	A	G	A	C	A	A	A	G	G	G	C	C	NA
Y5E5	X2B12.D	chains	T	C	G	C	A	188	C	A	T	C	C	A	T	G	C	267	C	A	G	T	467	A	T	G	C	T	G	T	G	A	C	T	T	G	G	A	NA	T	G	G	NA	G	G	A	C	C	C
Y1F8	X1F4.1	chains	G	T	G	C	A	188	C	C	G	C	T	G	C	G	C	267	C	A	G	T	467	A	C	G	C	T	G	C	G	G	C	C	T	G	G	A	A	C	A	G	NA	G	G	A	C	C	C
Y4A7	X2B12.E	chains	G	C	G	C	A	188	C	C	T	C	T	G	T	G	C	267	C	G	G	T	467	A	T	C	A	T	C	C	G	G	T	T	T	G	A	G	NA	T	G	A	A	C	A	G	C	C	C
Y1F10	X1F4.2	chains	G	C	A	T	C	188	C	NA	G	C	T	A	C	C	C	267	C	G	G	T	467	A	T	C	A	C	C	C	A	A	C	C	T	A	A	A	A	C	A	G	A	C	A	G	NA	G	NA
Y5C10	X2B12.E	chains	G	C	G	C	A	188	C	A	G	C	T	NA	T	G	C	267	C	A	G	T	467	A	T	C	C	C	G	C	G	G	T	C	C	A	A	A	NA	T	G	G	A	C	A	A	C	C	C
Y4C1	X2B12.D	chains	G	C	G	C	A	188	C	C	T	C	T	G	T	G	C	267	C	G	G	T	467	A	C	C	A	C	C	C	NA	A	T	T	T	G	A	G	A	C	A	G	NA	G	G	G	T	C	T
Y5D8	X2B12.C	chains	NA	T	G	C	A	188	NA	A	NA	C	T	G	NA	G	C	267	C	A	G	T	467	A	T	G	A	C	C	C	G	G	T	NA	C	G	G	NA	A	T	G	G	A	G	NA	A	T	C	T
Y5B12	X2B12.E	chains	NA	C	A	C	A	188	C	A	G	C	C	A	T	G	C	267	C	G	G	T	467	A	C	G	A	C	C	T	NA	G	T	C	C	G	G	G	NA	T	G	A	NA	C	A	A	T	C	C
Y1F1	X1F4.1	chains	T	T	A	C	A	188	T	C	T	C	T	G	T	G	C	267	C	A	G	T	467	A	T	G	C	T	C	C	G	G	T	C	T	G	G	A	G	T	G	A	A	C	A	A	T	C	C
Y4D7	X2B12.B	chains	T	C	A	T	A	188	C	A	G	T	T	A	C	C	T	267	T	G	G	T	467	C	T	C	A	C	C	C	NA	G	C	C	T	A	A	G	A	C	A	G	A	G	G	A	C	C	T
Y4F4	X2B12.F	chains	T	T	G	C	A	188	C	A	G	C	C	G	T	G	T	267	T	G	G	T	467	C	T	C	C	T	G	C	NA	A	C	C	C	A	G	A	NA	T	G	A	A	C	A	G	C	C	T
Y4E4	X2B12.C	chains	T	T	A	C	A	188	C	C	T	C	C	G	T	G	C	267	C	G	G	T	467	C	T	G	C	T	C	C	NA	G	C	C	T	A	A	A	A	C	A	A	NA	G	G	A	C	C	T
Y4A8	X2B12.E	chains	T	T	G	C	A	188	NA	A	G	C	C	A	T	G	C	267	C	A	G	T	467	NA	T	NA	C	T	G	T	A	G	T	C	T	A	A	NA	NA	T	G	A	A	G	G	NA	T	G	T
Y4A1	X2B12.D	chains	G	T	A	T	C	188	C	C	T	C	T	G	C	C	C	267	C	G	G	T	467	NA	T	C	C	C	C	C	G	G	T	T	T	A	A	A	A	C	A	G	NA	NA	G	A	T	C	T
Y4G1	X2B12.A	chains	G	C	G	C	A	188	NA	NA	T	C	NA	G	T	G	C	267	C	A	G	T	467	NA	C	C	C	T	C	T	NA	G	T	T	C	G	G	NA	A	C	A	G	NA	NA	NA	A	T	C	NA
Y5E6	X2B12.D	chains	T	T	G	C	A	188	C	A	NA	T	T	A	T	G	T	285	T	A	G	T	467	A	C	C	C	T	G	T	NA	G	T	T	T	A	A	A	NA	T	G	A	A	NA	G	G	C	G	NA
Y1B9	X4G10.3	chains	G	C	A	T	C	188	C	C	T	T	C	G	C	C	T	285	T	G	G	T	467	A	T	C	C	T	G	C	A	A	C	C	C	G	G	G	G	T	G	G	G	G	G	G	T	G	C
Y4C4	X2B12.D	chains	G	C	A	T	C	188	C	C	T	T	T	G	T	G	C	285	C	A	G	T	467	A	T	C	C	T	C	T	G	G	C	C	C	G	G	NA	NA	T	G	A	NA	G	G	NA	T	G	C
Y2A11	X1F4.1	chains	T	T	A	T	C	188	C	C	G	T	T	G	T	G	T	285	T	G	G	T	467	A	C	G	C	T	C	C	A	G	C	C	C	A	A	A	A	C	A	A	G	G	G	A	T	C	C
Y4G5	X2B12.A	chains	T	T	A	T	C	188	C	C	T	C	C	G	NA	C	T	285	T	A	G	T	467	A	T	C	A	T	G	T	G	A	T	T	T	G	G	G	NA	T	G	G	A	G	G	G	C	G	T
Y4F7	X2B12.F	chains	G	T	G	C	A	188	NA	A	G	C	NA	NA	NA	C	C	285	C	A	G	T	467	A	T	G	C	T	C	T	NA	G	T	T	C	G	G	NA	NA	C	A	G	NA	NA	NA	G	C	G	T
Y4B5	X2B12.F	chains	T	C	G	C	A	188	NA	A	NA	C	T	NA	NA	C	T	285	T	A	G	T	467	A	T	C	C	T	C	T	NA	G	C	C	NA	G	G	G	A	C	A	A	NA	NA	A	NA	T	C	C
Y4C8	X2B12.C	chains	G	C	A	T	A	188	NA	C	T	T	T	G	T	G	C	285	C	G	G	T	467	A	C	G	C	T	G	T	G	G	T	T	NA	A	A	A	NA	T	G	G	A	C	A	A	C	C	T
Y5D2	X2B12.B	chains	T	T	G	C	A	188	C	A	NA	C	T	A	T	C	T	285	T	A	G	T	467	A	T	G	C	T	C	C	NA	G	T	T	C	A	A	G	NA	NA	G	A	A	G	G	G	T	C	C
Y4D8	X2B12.B	chains	G	C	G	C	A	188	C	A	G	C	T	G	T	G	C	285	T	G	G	T	467	A	T	C	C	T	G	C	A	G	C	C	T	G	G	G	A	C	A	A	A	G	G	G	T	C	T
Y4H12	X2B12.A	chains	T	T	G	C	A	188	NA	C	T	C	C	NA	NA	C	T	285	T	NA	G	T	467	A	T	C	A	T	C	T	A	G	T	C	C	G	G	A	A	C	A	G	NA	C	A	A	C	C	C
Y4D12	X2B12.C	chains	G	C	A	C	A	188	NA	C	T	NA	T	A	T	G	T	285	T	A	G	T	467	A	C	C	A	C	C	T	G	NA	C	C	C	G	G	A	A	C	G	NA	A	G	G	NA	C	G	T
Y4H9	X2B12.B	chains	T	T	G	C	A	188	NA	A	G	C	T	A	NA	C	T	285	T	G	G	T	467	A	C	G	C	C	C	NA	NA	G	C	T	C	G	G	G	A	C	A	G	A	C	A	A	T	G	NA
Y5D11	X2B12.D	chains	G	T	G	C	A	188	C	A	G	C	C	A	NA	C	T	285	T	A	G	T	467	A	C	C	C	C	C	T	NA	G	T	T	C	A	A	A	A	C	A	G	NA	C	A	A	T	G	NA
Y4F6	X2B12.F	chains	G	C	G	C	A	188	C	C	T	C	T	A	C	C	T	285	C	G	G	T	467	A	T	C	A	C	G	T	G	G	C	C	C	A	A	G	NA	T	A	A	A	G	G	G	T	C	C
Y4B8	X2B12.C	chains	T	T	A	T	A	188	C	A	G	C	T	A	C	C	T	285	T	A	G	T	467	A	C	C	C	C	C	C	G	A	C	C	C	G	G	A	A	C	A	G	A	C	A	A	T	C	C
Y1E8	X2B12.3	chains	T	T	G	C	A	188	C	A	G	T	C	G	C	C	T	285	T	G	G	T	467	C	T	C	NA	C	C	NA	A	G	T	T	C	A	A	A	G	C	A	A	NA	G	G	A	C	C	C
Y1E6	X2B12.3	chains	T	T	G	C	A	188	C	C	G	C	T	G	C	C	T	285	T	G	G	T	467	C	T	C	C	T	C	T	G	G	T	C	T	G	G	G	G	C	A	A	G	G	G	G	T	C	T
Y5A11	X2B12.D	chains	G	NA	G	NA	A	188	NA	NA	G	C	C	A	T	C	T	285	T	A	G	T	467	C	C	C	A	T	C	T	NA	NA	T	T	NA	G	G	G	A	C	A	G	NA	G	NA	NA	T	C	T
Y5A3	X2B12.C	chains	T	C	G	C	A	188	C	C	T	C	T	G	NA	C	T	285	T	A	G	T	467	C	C	G	A	C	C	C	NA	A	C	C	C	A	A	NA	A	C	G	NA	A	G	NA	G	T	G	NA
Y4D10	X2B12.C	chains	G	C	G	C	A	188	C	C	T	C	C	G	T	C	T	285	T	A	G	T	467	C	T	C	A	C	C	T	A	A	T	C	C	G	G	G	A	C	A	G	NA	G	G	G	C	C	T
Y5C7	X2B12.E	chains	T	T	A	C	A	188	NA	A	T	T	C	A	NA	G	C	NA	C	G	G	T	467	A	T	C	C	T	C	T	NA	G	C	T	T	A	A	NA	NA	T	G	G	A	G	G	A	NA	G	T
Y5B9	X2B12.F	chains	T	C	A	T	A	188	C	C	T	T	T	A	T	C	T	NA	T	A	G	T	467	A	C	C	C	T	C	C	G	A	T	T	T	G	G	G	A	C	A	A	A	G	G	A	T	G	T
Y4A11	X2B12.E	chains	T	T	G	C	A	188	C	C	T	T	T	A	NA	C	T	NA	T	A	G	T	467	A	C	C	A	C	C	C	NA	A	C	C	C	A	A	A	NA	T	A	G	NA	C	A	G	T	C	C
Y4F10	X2B12.F	chains	T	T	G	C	A	188	C	C	T	T	T	A	C	C	T	NA	T	G	G	T	467	A	T	G	A	C	C	T	NA	G	C	C	T	A	G	A	NA	T	G	G	A	G	G	G	C	C	C
Y4H8	X2B12.D	chains	NA	T	G	C	A	188	NA	C	T	C	T	NA	T	G	NA	NA	C	A	G	T	467	A	C	NA	C	T	C	T	NA	G	T	T	T	G	G	G	NA	C	A	G	NA	G	G	NA	T	G	NA
Y4B11	X2B12.D	chains	G	C	G	C	A	188	C	A	G	C	T	A	NA	C	T	NA	C	G	G	T	467	A	NA	G	A	T	C	C	G	A	C	C	C	G	G	A	NA	T	A	G	NA	C	A	G	T	G	T
Y4A10	X2B12.E	chains	T	T	G	C	A	188	C	C	T	C	T	G	C	C	C	NA	C	A	G	T	467	A	T	G	A	C	C	C	NA	G	C	T	T	A	A	G	NA	T	G	A	A	G	G	G	T	C	T
Y5B4	X2B12.E	chains	T	T	G	C	A	188	NA	A	G	C	C	A	NA	C	T	NA	NA	NA	G	T	467	A	C	C	C	T	C	C	NA	G	C	C	C	G	G	NA	A	C	A	NA	A	G	G	G	T	C	NA
Y5C12	X2B12.B	chains	T	NA	A	T	C	188	NA	A	T	C	C	A	NA	C	T	NA	C	G	G	T	467	A	T	C	C	T	G	T	A	NA	T	T	T	A	A	A	A	C	NA	G	A	C	A	A	NA	G	C
Y5C9	X2B12.E	chains	G	T	G	C	A	188	C	A	G	C	T	A	T	C	T	NA	T	A	G	T	467	A	T	C	C	T	C	C	NA	G	C	C	T	A	A	A	A	C	A	G	A	G	G	A	C	C	T
Y4A5	X2B12.D	chains	T	C	A	T	C	188	C	A	T	C	T	G	C	C	C	NA	C	G	G	T	467	A	T	C	A	C	G	C	G	G	C	C	T	A	A	A	A	C	A	G	A	G	G	A	T	C	C
Y5B8	X2B12.C	chains	NA	NA	A	T	A	188	C	A	G	C	T	NA	NA	G	T	NA	T	G	G	T	467	A	NA	G	NA	C	G	C	NA	A	C	C	NA	G	G	A	A	C	G	G	A	G	G	G	T	C	T
Y4E8	X2B12.E	chains	T	T	G	C	A	188	C	A	G	T	T	A	C	C	T	NA	C	G	G	T	467	C	C	C	A	C	C	T	NA	A	T	T	C	A	A	G	NA	T	G	G	NA	C	A	NA	T	G	NA
Y5C8	X2B12.E	chains	T	T	NA	C	A	188	C	A	G	C	C	A	NA	C	T	NA	NA	G	G	T	467	C	T	C	A	T	C	C	NA	A	T	T	NA	A	A	A	NA	T	G	NA	NA	C	A	A	T	G	C
Y5C6	X2B12.A	chains	G	C	A	T	C	NA	T	A	G	T	T	G	C	C	T	285	T	A	G	T	467	A	T	G	C	C	C	C	NA	A	T	T	T	A	A	A	NA	T	G	A	A	G	G	G	C	G	T
Y5A1	X2B12.F	chains	NA	NA	NA	NA	NA	171	NA	NA	NA	C	T	A	NA	C	NA	285	NA	NA	G	T	NA	NA	NA	NA	A	NA	C	NA	A	A	NA	T	NA	NA	NA	NA	NA	NA	G	NA	A	NA	NA	NA	NA	NA	NA
Y5E11	X2B12.D	chains	G	C	G	C	A	NA	C	A	G	T	C	G	C	C	T	NA	T	A	G	T	NA	C	T	G	C	T	C	C	NA	A	C	C	T	A	A	A	A	C	A	A	A	C	A	A	T	G	T
Y5B3	X2B12.E	chains	NA	NA	G	NA	A	188	NA	C	T	NA	T	NA	T	C	T	NA	T	G	NA	C	484	C	NA	G	C	T	C	NA	NA	G	NA	C	NA	A	NA	NA	NA	T	A	NA	NA	G	G	A	T	G	NA
Y5A4	X2B12.C	chains	NA	C	A	NA	C	188	NA	A	G	C	C	NA	NA	C	NA	285	T	A	NA	NA	NA	C	T	G	C	C	C	NA	G	G	T	NA	C	G	G	NA	NA	T	A	G	NA	G	NA	A	T	G	NA
Y5A2	X2B12.F	chains	T	T	G	C	A	188	NA	A	T	T	T	A	NA	C	T	285	T	A	NA	T	467	NA	NA	C	C	C	G	T	A	G	T	NA	C	NA	G	NA	NA	T	NA	NA	A	G	G	G	NA	C	C
Y5B6	X2B12.E	chains	T	T	G	C	A	188	NA	A	G	NA	T	A	NA	C	C	NA	C	G	NA	T	467	C	C	G	A	C	G	T	G	G	C	C	NA	G	G	NA	A	C	A	NA	NA	G	NA	G	NA	G	T
Y4F5	X2B12.F	NA	T	T	A	T	A	188	C	A	G	T	C	G	C	C	T	285	T	A	G	C	NA	A	C	C	C	C	C	C	NA	A	T	C	C	A	A	G	NA	T	G	G	A	G	G	A	T	G	T
Y2A3	X1F4.1	rosettes	T	T	G	C	C	171	T	C	G	T	T	A	C	C	T	267	C	G	A	C	484	C	C	C	A	C	C	T	G	G	C	C	T	NA	A	A	G	T	G	G	G	G	G	G	T	G	C
Y1A5	X4G10.1	rosettes	T	T	G	C	A	171	T	C	T	T	T	G	T	G	C	267	C	G	A	C	484	C	C	G	A	C	C	C	G	A	C	C	T	G	G	G	A	C	A	A	A	C	A	A	T	G	C
Y1E4	X2B12.3	rosettes	G	C	A	T	C	171	T	C	G	T	T	G	T	G	C	267	C	G	A	C	484	C	C	G	C	T	C	C	G	G	C	C	C	G	G	A	A	C	A	G	G	C	A	A	T	C	C
Y4D3	X2B12.B	rosettes	G	C	A	T	C	171	T	C	T	C	C	A	T	G	C	267	C	G	A	C	484	C	C	C	A	C	C	C	A	G	C	C	T	A	A	G	A	C	A	A	NA	C	A	G	T	G	T
Y1C5	X4G10.3	rosettes	G	T	NA	T	C	171	T	C	T	T	NA	A	NA	NA	T	285	T	NA	A	C	484	C	C	C	C	T	G	C	NA	G	T	T	C	G	G	A	G	T	G	A	A	C	NA	G	C	G	T
Y1C2	X4G10.3	rosettes	T	T	A	T	C	171	T	A	T	T	T	G	C	C	T	285	T	G	A	C	484	C	T	G	C	C	C	T	A	G	C	C	T	A	A	A	G	T	G	A	A	C	A	G	C	G	T
Y5A7	X2B12.C	rosettes	G	C	G	C	C	171	T	C	T	C	T	A	T	C	T	285	T	NA	A	C	484	C	T	G	A	C	G	T	G	G	C	T	NA	A	A	NA	A	C	A	G	A	G	G	G	C	NA	C
Y1H4	X1H8.2	rosettes	T	T	A	C	A	188	C	A	G	T	T	A	T	G	C	267	C	G	A	C	484	C	C	G	A	C	C	T	G	A	C	C	C	G	G	A	A	C	A	A	G	G	G	G	T	C	T
Y4B4	X2B12.F	rosettes	T	C	A	T	C	188	C	A	G	C	T	G	T	G	C	267	T	A	A	C	484	C	T	C	A	T	C	C	NA	G	C	C	C	A	A	A	A	C	G	A	A	G	G	A	C	G	NA
Y4E1	X2B12.C	rosettes	G	C	G	T	C	188	NA	C	NA	C	T	A	T	G	C	267	C	A	A	C	484	C	T	G	A	T	G	T	A	A	T	T	NA	A	A	NA	A	C	A	G	A	G	NA	G	T	G	NA
Y2C4	X1F4.2	rosettes	T	T	G	C	A	188	C	C	T	C	T	A	T	G	C	267	C	G	A	C	484	C	C	C	C	T	C	T	A	G	T	T	T	A	A	A	A	C	G	A	G	C	A	A	T	C	C
Y4E7	X2B12.F	rosettes	G	C	G	C	A	188	C	C	T	C	T	A	T	G	C	267	C	A	A	C	484	C	C	C	C	T	G	C	G	G	C	C	C	A	A	A	NA	T	G	G	NA	C	G	A	T	C	NA
Y2A12	X1H8.1	rosettes	G	C	G	T	C	188	C	A	G	C	T	A	NA	G	NA	267	NA	NA	A	C	484	C	C	C	NA	NA	C	C	A	G	C	NA	T	A	A	A	A	C	A	A	A	C	A	G	C	G	T
Y4F9	X2B12.F	rosettes	G	C	G	C	A	188	C	C	T	C	C	A	C	C	T	267	T	G	A	C	484	C	T	C	A	C	G	T	NA	G	T	T	T	A	A	A	A	C	A	A	A	C	A	NA	C	G	C
Y3F11 (same as Y2C4)	X1F4.2	rosettes	T	T	G	C	A	188	C	C	T	C	T	A	T	G	C	267	C	G	A	C	484	C	C	C	C	T	C	T	A	G	T	T	T	A	A	A	A	C	G	A	G	C	A	A	T	C	C
Y5A12	X2B12.F	rosettes	G	T	A	T	C	188	C	C	T	T	C	A	C	C	T	285	T	G	A	C	484	C	C	G	A	T	C	T	G	G	T	C	NA	A	A	G	NA	T	G	A	A	G	G	G	T	C	T
Y2A5	X1F4.1	rosettes	NA	T	G	C	A	188	C	C	T	T	C	G	C	C	T	285	T	A	A	C	484	C	C	C	C	T	C	C	A	G	C	C	C	G	G	G	A	C	A	A	G	C	A	A	T	G	T
Y3F8 (same as Y2A5)	X1F4.2	rosettes	T	T	G	C	A	188	C	C	T	T	C	G	C	C	T	285	T	A	A	C	484	C	C	C	C	T	C	C	A	G	C	C	C	G	G	G	A	C	A	A	G	C	A	A	T	G	T
Y5A8	X2B12.C	rosettes	T	T	G	C	A	188	C	C	T	T	C	G	NA	C	T	NA	T	A	A	C	484	C	T	G	A	NA	C	C	G	G	C	C	T	G	G	A	A	C	A	A	NA	G	G	NA	T	G	C
Y5B11	X2B12.A	rosettes	NA	T	G	C	A	188	C	C	T	C	T	A	T	G	NA	NA	T	G	A	NA	467	A	C	C	C	T	C	T	A	A	T	T	T	G	G	A	A	T	G	G	A	G	G	G	T	C	T
Y2B1	X1H8.1	rosettes	T	T	G	NA	A	188	NA	A	G	T	T	G	NA	G	C	267	C	A	A	NA	484	NA	T	C	NA	T	C	C	G	G	C	C	NA	A	A	G	NA	T	G	A	NA	G	G	NA	T	G	T
Y1B1	X4G10.2	rosettes	G	T	A	T	C	171	T	A	G	T	C	G	T	G	C	267	C	A	A	T	467	A	T	C	C	T	C	T	G	G	C	C	T	A	A	A	A	C	A	G	NA	G	G	G	T	G	C
Y4G7	X2B12.A	rosettes	G	C	A	T	C	171	T	A	G	T	C	G	T	G	C	267	C	G	A	T	467	A	T	G	C	C	G	C	NA	G	C	T	T	G	G	A	NA	T	G	A	A	C	NA	NA	C	C	C
Y5A10	X2B12.D	rosettes	G	C	G	NA	C	171	T	A	G	C	T	A	T	NA	C	267	NA	G	A	T	467	A	C	C	C	T	G	NA	G	G	T	T	C	NA	A	A	A	NA	A	A	A	G	G	NA	NA	C	T
Y4G10	X2B12.A	rosettes	T	T	G	C	C	171	T	C	T	C	T	G	T	G	C	267	C	A	A	T	467	A	C	C	C	C	C	T	NA	G	T	T	C	G	G	A	A	C	A	G	A	G	G	G	T	G	C
Y4F3	X2B12.F	rosettes	T	C	G	C	C	171	T	C	G	T	T	A	NA	C	T	267	T	G	A	T	467	A	T	C	C	C	G	T	NA	G	T	T	T	G	G	A	A	C	A	A	A	C	A	G	T	G	C
Y4A6	X2B12.E	rosettes	T	T	A	T	C	171	T	A	G	T	C	A	T	G	C	NA	C	G	A	T	467	A	T	G	A	C	C	NA	NA	G	C	C	C	A	A	NA	NA	T	G	NA	A	G	G	G	C	C	NA
Y1F4	X1F4.1	rosettes	T	T	G	C	A	188	C	A	G	T	T	A	T	G	C	267	C	A	A	T	467	A	C	G	C	T	C	T	G	A	T	T	T	A	A	A	A	C	A	G	NA	G	G	A	T	G	T
Y4C6	X2B12.C	rosettes	G	C	A	T	C	188	C	C	T	C	C	G	C	C	T	267	T	A	A	T	467	A	T	G	A	C	G	T	NA	A	C	C	C	G	G	G	A	C	A	G	A	C	A	A	C	C	T
Y4H2	X2B12.A	rosettes	G	C	A	C	A	188	C	A	T	C	C	G	T	G	C	267	C	G	A	T	467	NA	T	C	C	T	C	C	NA	G	T	T	C	G	G	A	NA	T	G	A	NA	G	G	G	C	G	T
Y1C11	X2B12.1	rosettes	G	C	G	C	A	188	C	A	G	T	T	G	C	C	T	285	T	G	A	T	467	A	C	C	A	C	C	T	G	A	C	C	C	A	A	G	A	C	A	A	A	C	A	A	T	G	C
Y5D7	X2B12.C	rosettes	T	T	G	C	A	NA	C	C	T	C	C	A	C	C	T	NA	T	G	A	T	NA	A	T	G	C	T	G	C	NA	G	C	C	C	A	A	G	NA	C	A	G	NA	C	A	G	C	C	C
[truncated: 13 more columns]
