# Supplementary material for: The rosetteless gene controls development in the choanoflagellate S. rosetta
Source: eLife journal article supplement (doi:10.7554/elife.04070), 2014-10-09

Salpingoeca rosetta CTLD-containing proteins

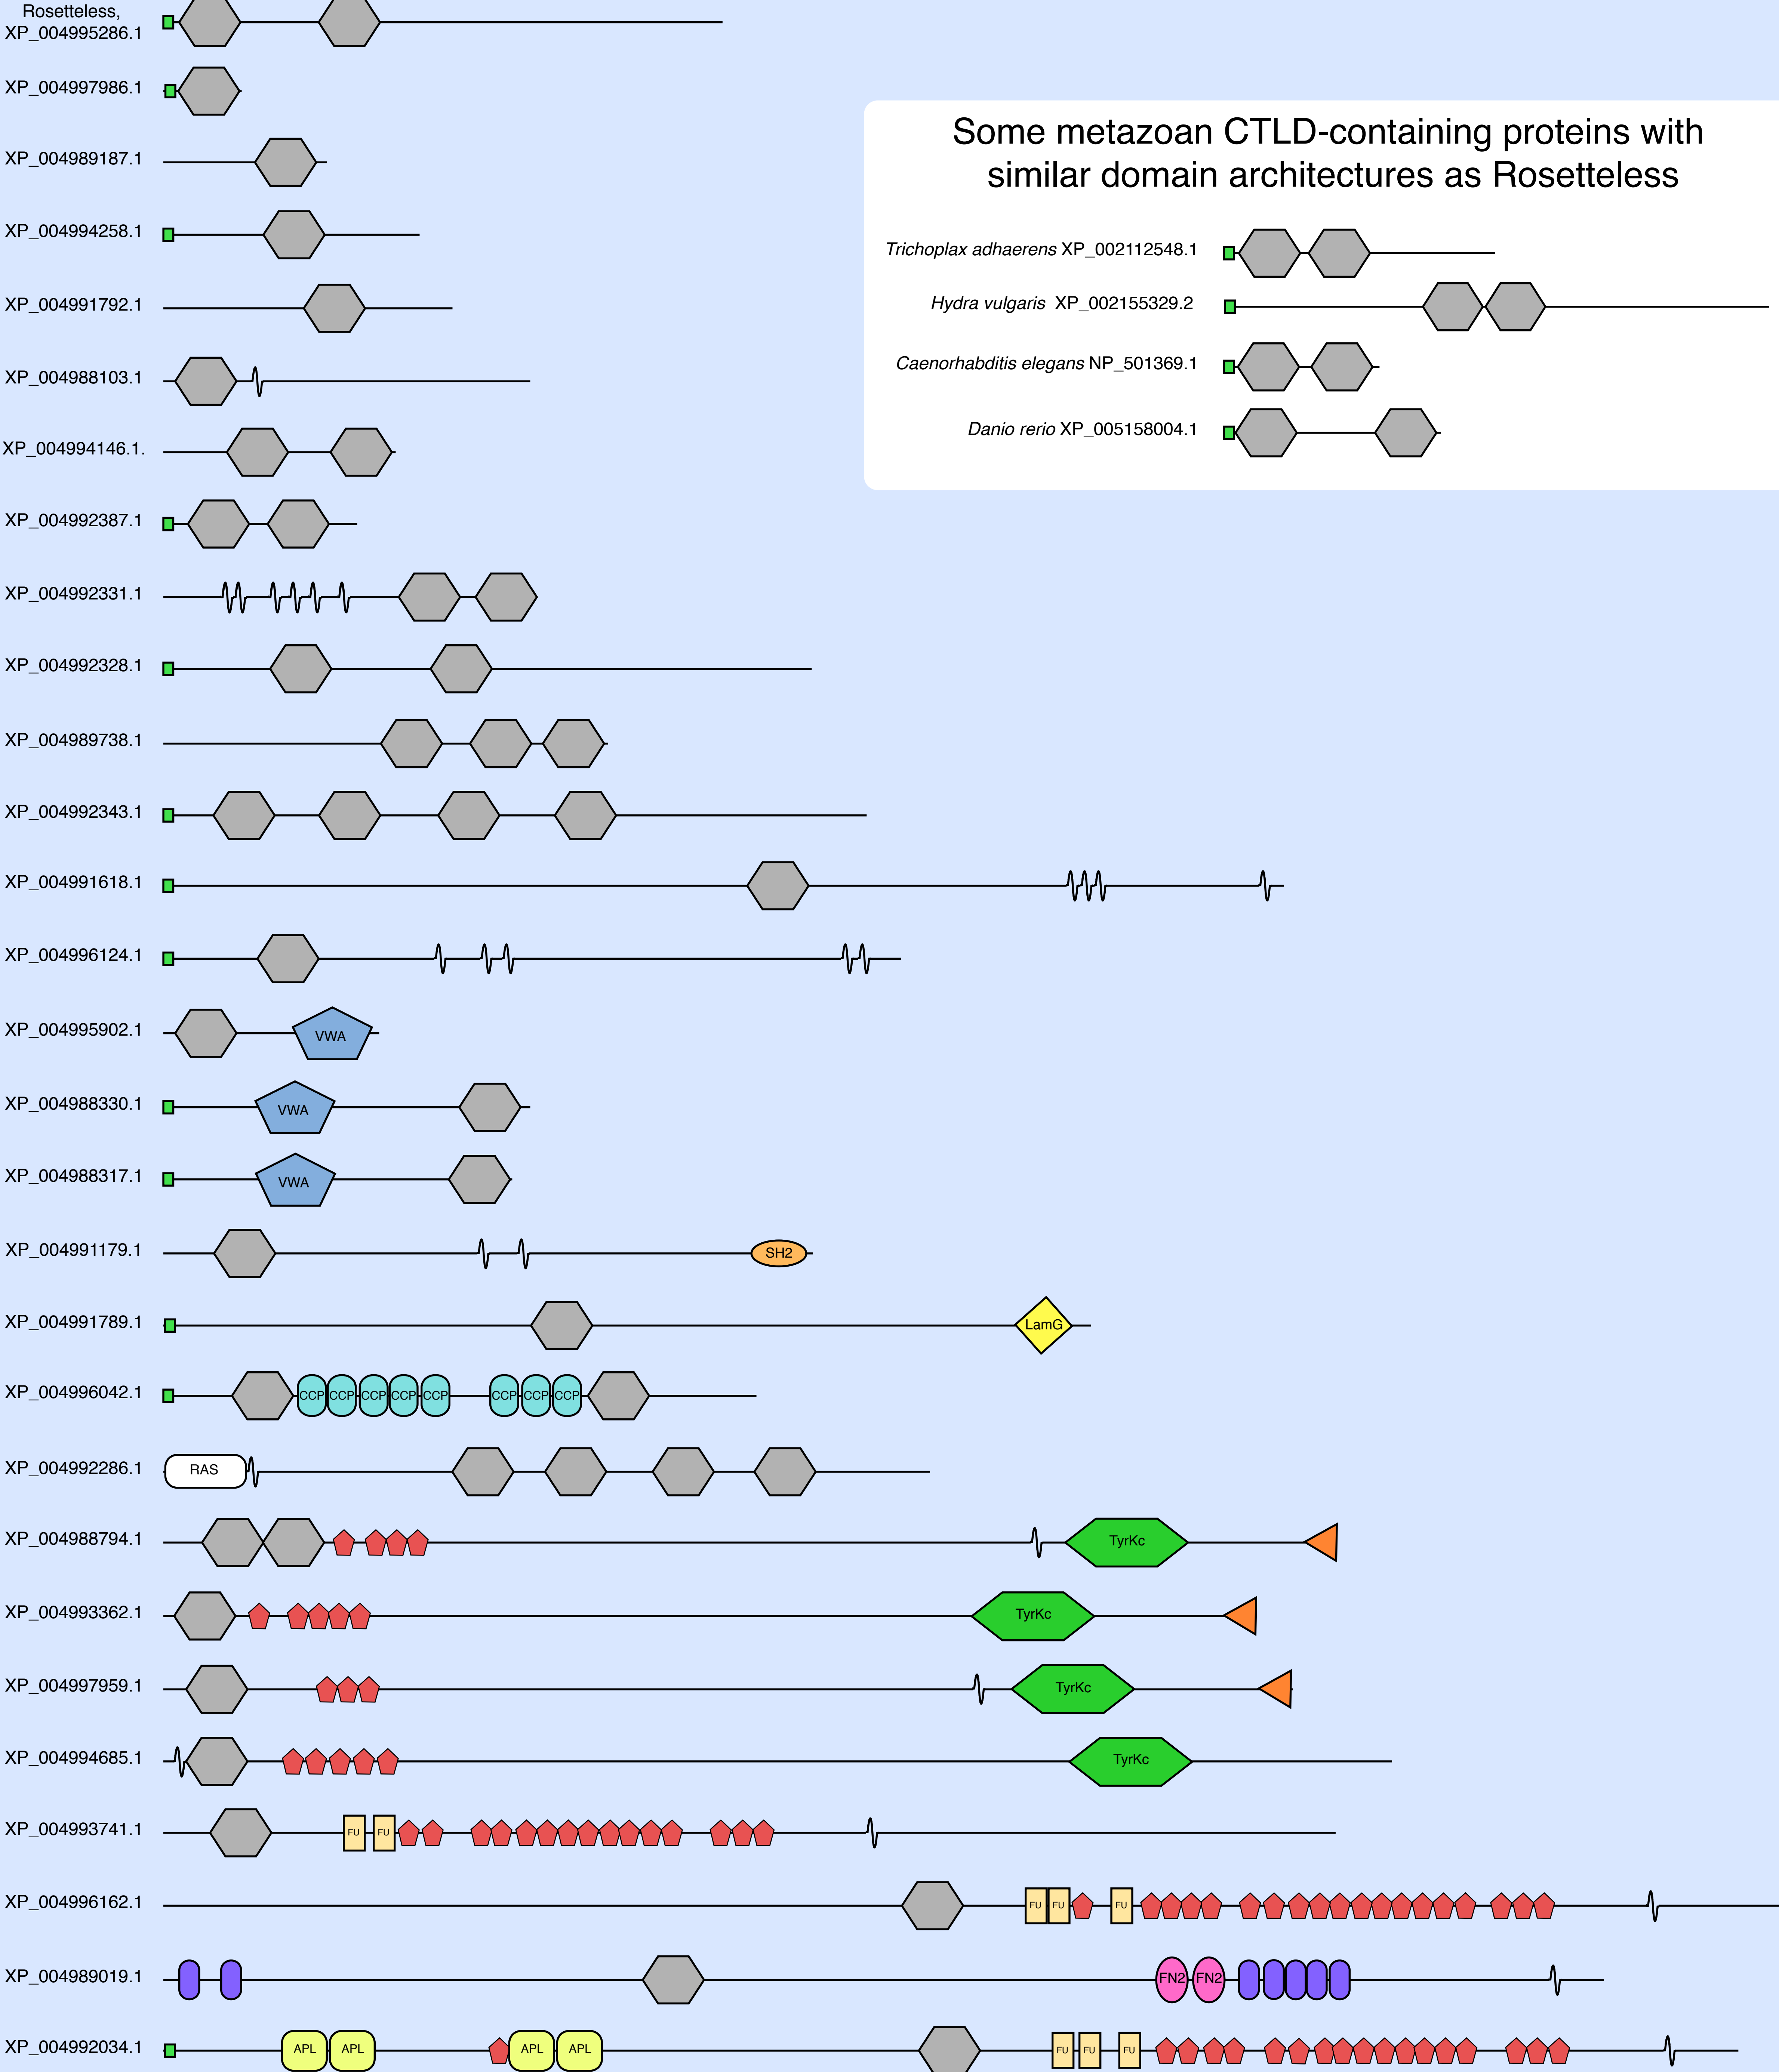

Monosiga brevicollis CTLD-containing proteins

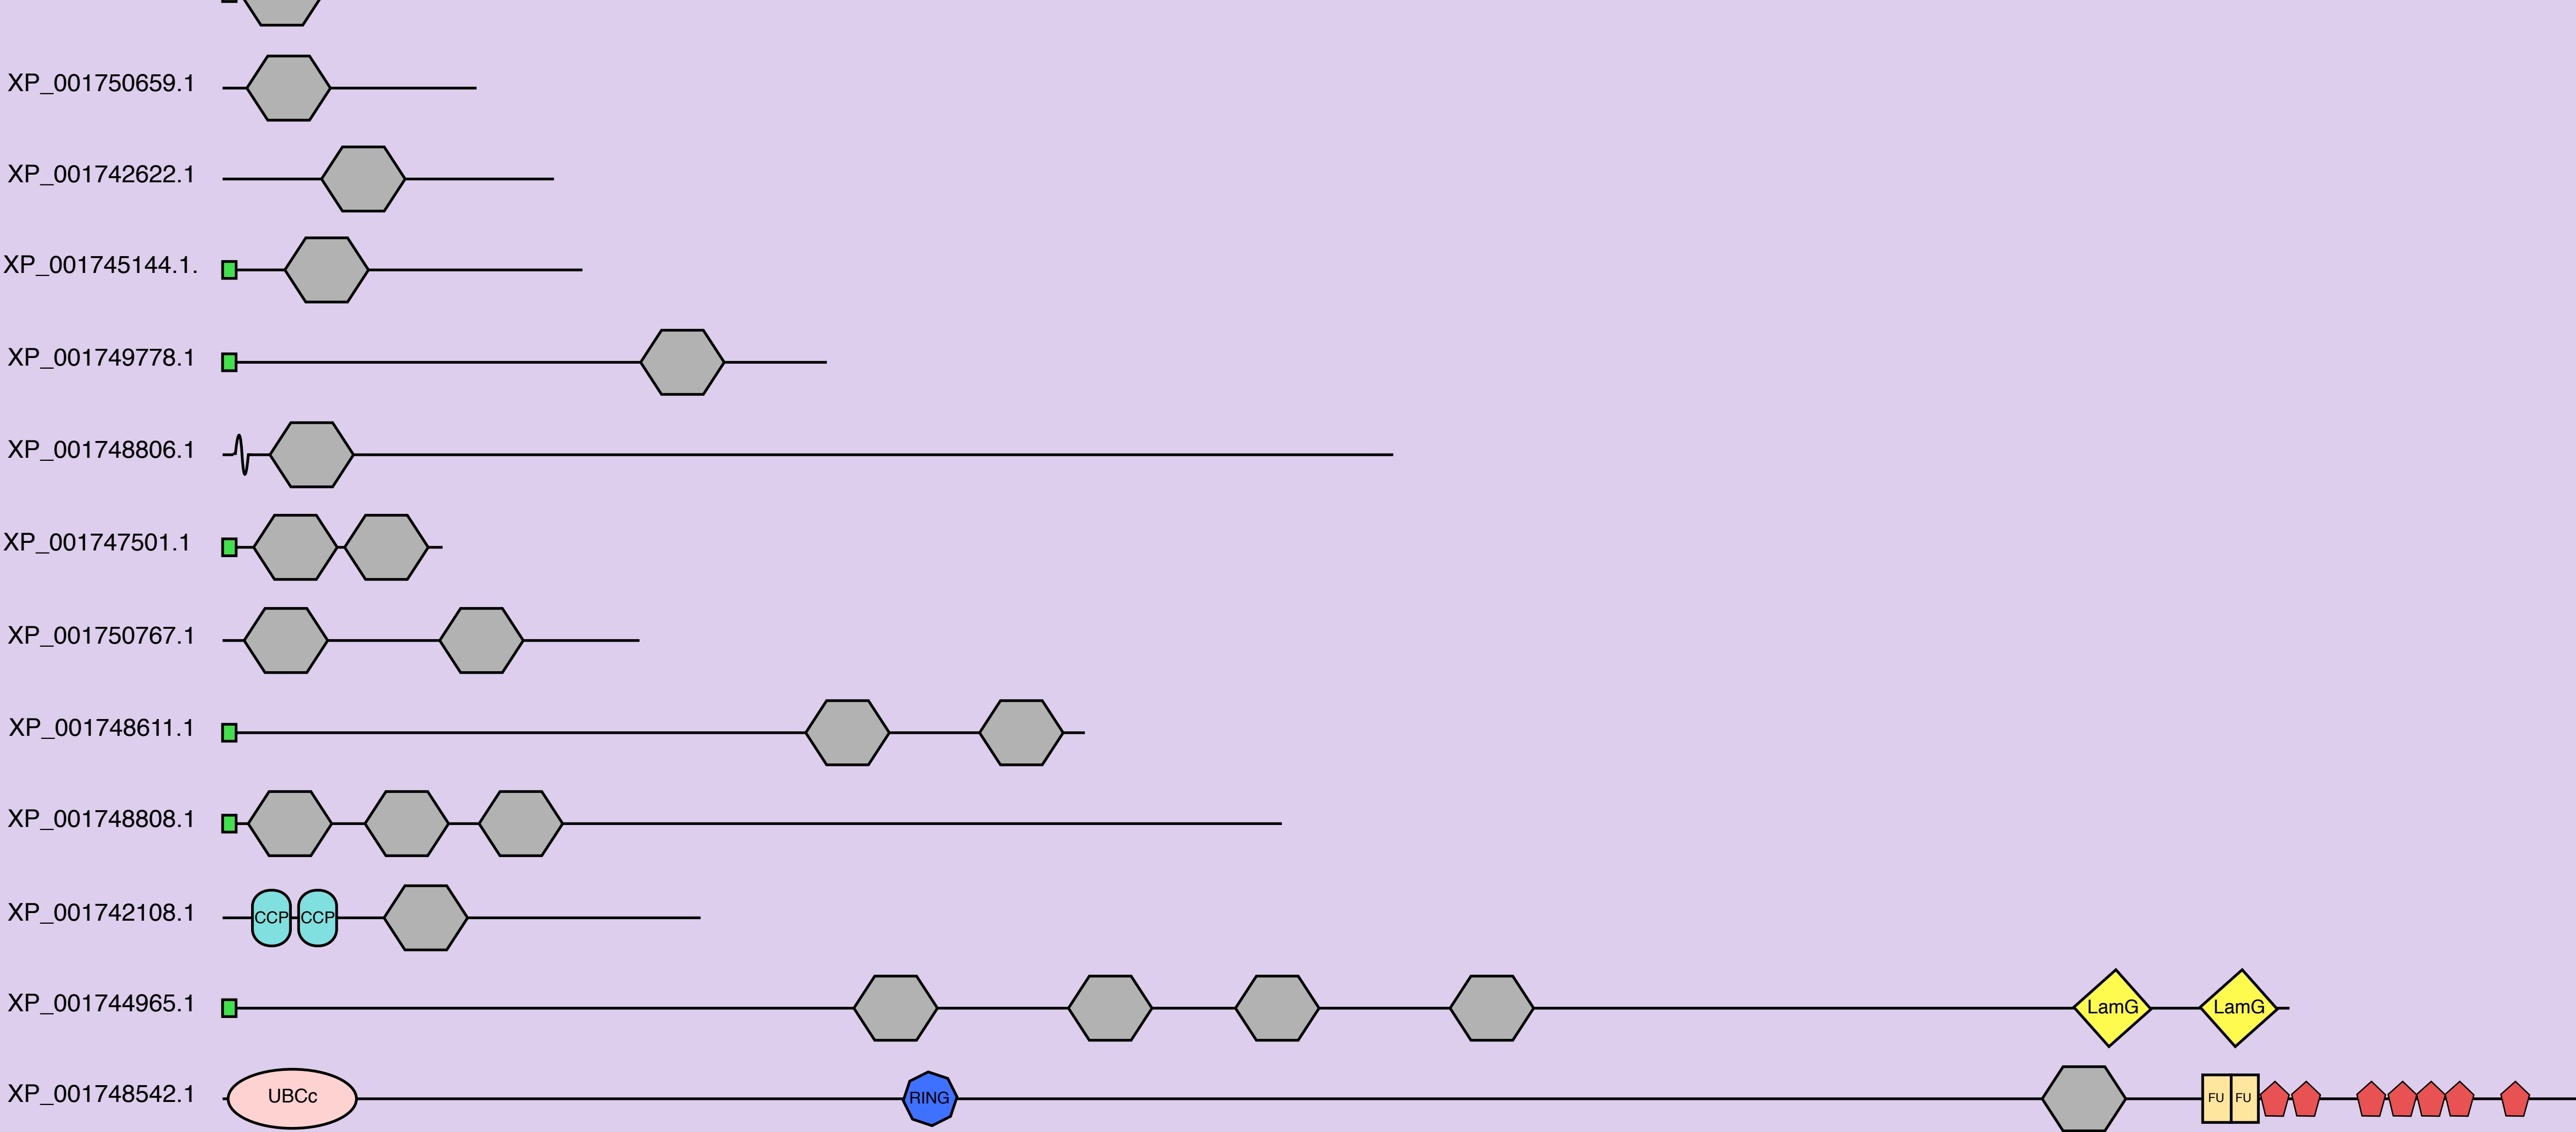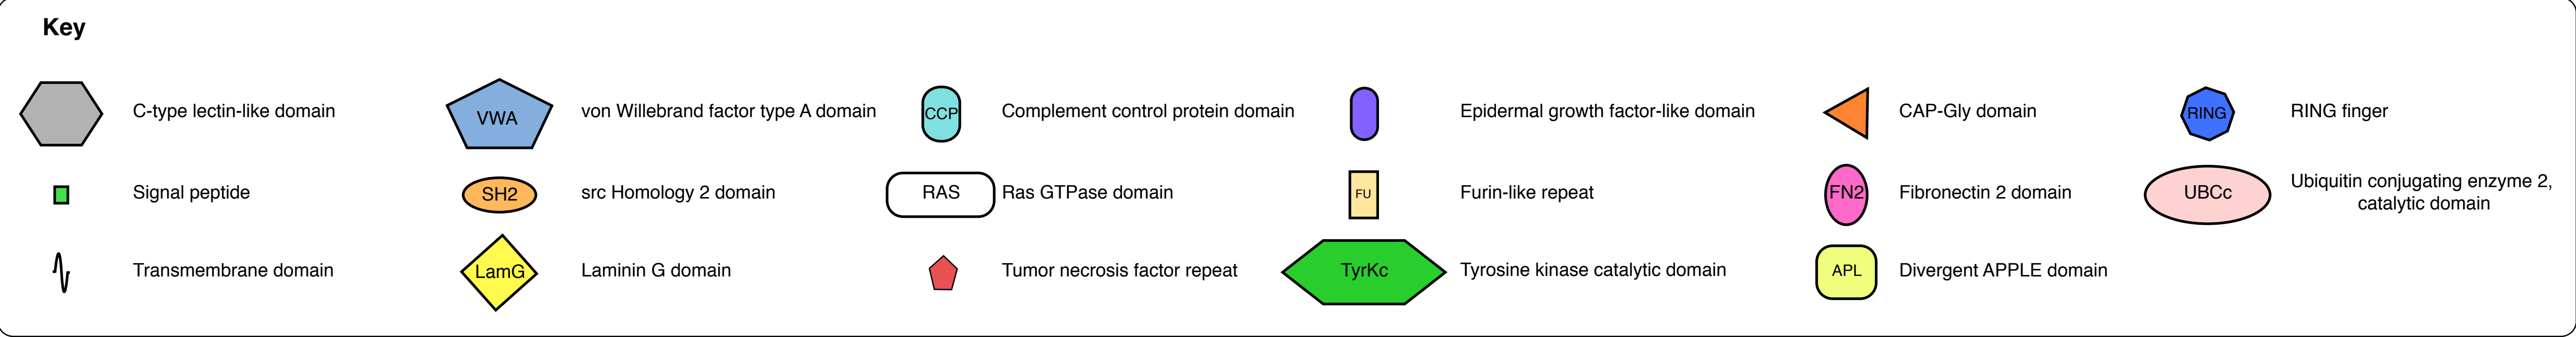

Supplement: supp [file elife_poa_e04070_Fig5_Figure_Supplement_2.pdf › elife_poa_e04070_Fig5_Figure_Supplement_2.pdf]
