# Supplementary material for: The rosetteless gene controls development in the choanoflagellate S. rosetta
Source: eLife journal article supplement (doi:10.7554/elife.04070), 2014-10-09

A

Parental strain

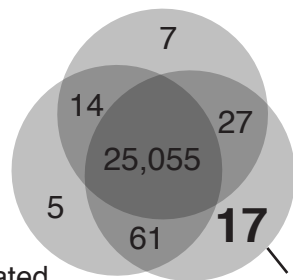Co-isolated  
WT strain

Rosetteless

B

| Supercontig | Location       | Position<br>relative to<br>genes | Verified? |
|-------------|----------------|----------------------------------|-----------|
| 1           | 343,191        | intron                           | FN        |
| 1           | 343,193        | intron                           | FN        |
| 1           | 401,602        | intron                           | FP        |
| 1           | 401,606        | intron                           | FP        |
| 2           | 1,595,442      | intron                           | V         |
| 5           | 1,669,635      | synonymous                       | FN        |
| 5           | 1,770,007      | synonymous                       | GM        |
| 6           | 1,658,977      | synonymous                       | V         |
| 6           | 1,743,400      | synonymous                       | FN        |
| <b>8</b>    | <b>427,804</b> | <b>splice donor</b>              | <b>V</b>  |
| 10          | 1,118,925      | intergenic repeat                | FN        |
| 14          | 1,268,439      | intron                           | FP        |
| 22          | 1,229,741      | intron                           | V         |
| 29          | 385,389        | intron                           | FN        |
| 32          | 746,459        | intron                           | GM        |
| 39          | 5,326          | intron                           | FN        |
| 39          | 5,329          | intron                           | FN        |

C

Parental strain

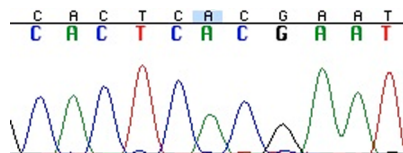

Rosetteless

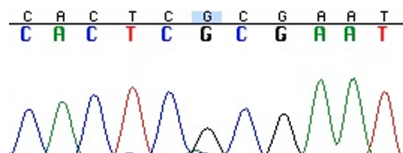

Supplement: supp [file elife_poa_e04070_Fig_4_Figure_Supplement_1.pdf › elife_poa_e04070_Fig_4_Figure_Supplement_1.pdf]
