# Supplementary material for: The rosetteless gene controls development in the choanoflagellate S. rosetta
Source: eLife. 2014 Oct 9;3:e04070. doi: 10.7554/eLife.04070 (PMC4381721; doi:10.7554/eLife.04070)
Supplement: Supplementary file 2. — Polymorphic sequences targeted by KASP genotyping. DOI: http://dx.doi.org/10.7554/eLife.04070.021 [file elife04070s003.xlsx]

## Sheet: Sheet1
Supplementary file 2: Polymorphic sequences targeted by KASP genotyping
Polymorphic bases are enclosed in square brackets and alternate alleles are separated by a slash.
Marker name	KASP sequence
sc001_02, sc1: 401320	ACTGAAGGGCGCAAT[T/G]CCGCTGATCCAAAA
sc001_03, sc1: 979131	GGCACACCCAGTCAG[T/C]GCTTACCAGGATGT
sc002_02, sc2: 780731	CCTTGCTCACCAGCT[AC/GT]GGGTTTCCTTGGCT
sc002_03, sc2: 1282949	TCTGCTTGGGTCGAG[T/C]AAGCCCAAGGGCGG
sc002_04, sc2: 1595442	CTCACTCACTCRCTC[C/A]CTCGCMCGCAGAAA
sc002_06, sc2: 1810508	TTGGATTTCGCTCGC[T/C]CCTTCCTGCTGCTG
sc003_06, sc3: 1291000	CCATGCACAGACGCT[C/A]CGCCCGCTCACCCG
sc003_08, sc3: 1489722	GCGTGTGTGTGTGGA[T/G]GGGATGCTGCGGCG
sc004_01, sc4: 172055	CTCACGCATGTGCGG[T/C]TGTCGCAATCATTG
sc005_03, sc5: 1276357	GAGCATCAATCGAAT[C/T]GCCTTTTCGCAATC
sc006_03, sc6: 1658977	AGCCTTGGCCTCAAT[G/A]TCACCGCGCACCTG
sc007_01, sc7:138815	AATCGTTGCTCATTC[T/C]TGCTGCGCTGCTTC
sc007_02, sc7: 405691	CTTGTCGTGTTCCAT[C/G]CACACTTGCCCCTG
sc007_03, sc7: 702151	GTTCGTGGTCACAAC[T/C]CTTCAAACGCCCTC
sc007_07, sc7: 934164	GGCCCTTGAGCTCCT[T/C]CTTCTTCTTCCGCG
sc007_08, sc7: 1879105	GCAGGCTCAGCTCCA[A/G]GTCCGTGAAGCGCA
gt2, sc8: 427804	GAACGCCAAGCACTC[A/G]CGAATTCAGTCATG
sc008_01, sc8: 1005930	GGGCGCTACCACGTG[T/C]CATGTGGCATCATT
sc008_04, sc8: 1430400	TTCATCCACACCATC[C/A]ATCTCAACCAGCAG
sc009_05, sc9: 1372142	TCGCAGTTCCCTGCG[T/C]AGGTTACAGACAAA
sc011_02, sc11: 1098842	TTTCGTGTTTGGCCT[G/C]ACGAGAggtgtgtg
sc014_03, sc14: 463971	GGCGCGAGTTCGAAT[C/A]TCGTCCTGATCAAA
sc014_07, sc14: 1181348	GTCCACGGACATTGC[T/C]GGATATGCGCTCGT
sc015_03, sc15: 246272	GGAGAGCGCGCGGTT[G/C]TTTGCAGCCGTCAT
sc018_04, sc18: 362146	GTCCATGAACTGCAC[C/T]GCACCCCTTTCCAA
sc018_10, sc18: 1381402	AGTGCATGCATGCAA[G/A]CAGTGGTTGGTCAC
sc019_03, sc19: 350005	GCACCGCTTCCCATC[A/G]CTGTCCGAGCTGGT
sc020_05, sc20: 427369	GGCANAATGCGATTG[C/T]GGGTGCAGGGAACA
sc020_06, sc20: 800101	AGGTGAGCAAGAATG[C/T]TTGGCAGGAAACCG
sc021_01, sc21: 76320	AACGCGTCCTCGCTG[T/C]GGTGTCGGCTGTTG
sc022_03, sc22: 250176	AAAATCAATACATGA[G/A]GAAACAGCGTGTAC
sc022_07, sc22: 401818	GGGCAAGGGTGTGAG[G/A]GGTGTGATGGAACA
gt3, sc22: 1,229,741	ACGTCAAGATCGAGT[G/A]CGAATGCGTGTGTG
sc023_03, sc23: 396420	GAGGCCCGCGGCAAG[G/A]ATGACGCCGCGGAA
sc023_06, sc23: 602502	GCTGGCTGGCGAGCG[C/T]TCCGACATGTTCCT
sc023_08, sc23: 879985	ARCAATTCATGTTGT[A/G]TCAGCCATCGTGCG
sc026_02, sc26: 283024	GTGCTCGTAGCTGTG[G/A]GTGTATCTATGTCT
sc027_01, sc27: 149724	TCACCGCCAACAGCG[A/G]CCACGAGGGCGTTC
sc028_01, sc28: 135001	TTGTGCACGTATGTG[C/G]GTGCGTGCATGTGC
sc028_04, sc28: 301740	GGCCCACGCGTACGC[A/G]GACTCGCCCGTAAA
sc029_03, sc29: 66009	TACCCCCTGACACCC[G/A]CACCACACACTACC
sc029_10, sc29: 802269	CATCGCTCGTCTCAC[C/T]GTCACGTGCACATG
sc034_03, sc34: 495763	GCAGCAACGAATGGA[C/G]AAAGAACGACGTTG
sc035_01, sc35: 36915	CTGGATAATCTCTGG[C/T]GCAAGGTACCCCGG
sc035_02, sc35: 308091	CGACCGCTGGGCGAA[G/A]CATCCAACAGCAGC
sc036_01, sc36: 16484	CCATGGAAGAGATGA[G/A]GCCGCGTGTGCTCA
sc036_05, sc36: 198774	ACGCTCGCATCAACA[C/A]ACCCCACATATCCC
sc038_01, sc38: 134205	TGGCTGAGATCCAGG[T/C]ACACCCGCAAGGTG
sc039_04, sc39: 200367	CAGCCAAACCCACAC[G/A]GCGCATTTTGCATC
sc039_05, sc39: 383710	CAATGCGCACTCGAC[T/C]GCCATCCGGGCGTG
sc040_01, sc40: 215035	CTCTCACACACACAN[T/A]CTCTCTCTCTCTCG
sc071_02, sc71: 3236	TGACAATGGGTGAAG[C/T]TGGTGCCTTGACGG
sc086_01, sc86: 5084	AGGCGCAGACACACA[G/A]CAACACCCAAGGCA
sc102_02, sc102: 3104	GTGTCGATCTCACAC[G/A]CATCAACGCACACC
sc125_01, sc125: 2793	GCCGGAGGTGAGGGT[T/C]GCTGCCATGCTCTG
sc130_01, sc130: 2521	GCTTGTCTCTGCAAC[A/C]CCAGGCCCCTTGGT
sc140_02, sc140: 2304	TTGTTCTGCCTTGCG[A/G]TTCTGATTGTGGTC
