# Supplementary figures and images for: The rosetteless gene controls development in the choanoflagellate S. rosetta
Source: eLife journal article supplement (doi:10.7554/elife.04070), 2014-10-09

A

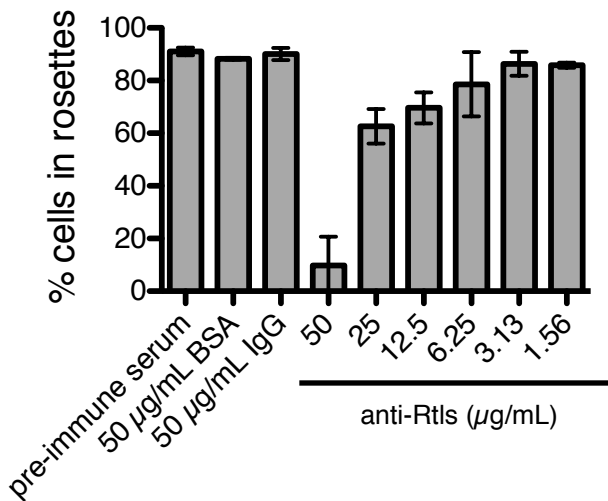

B

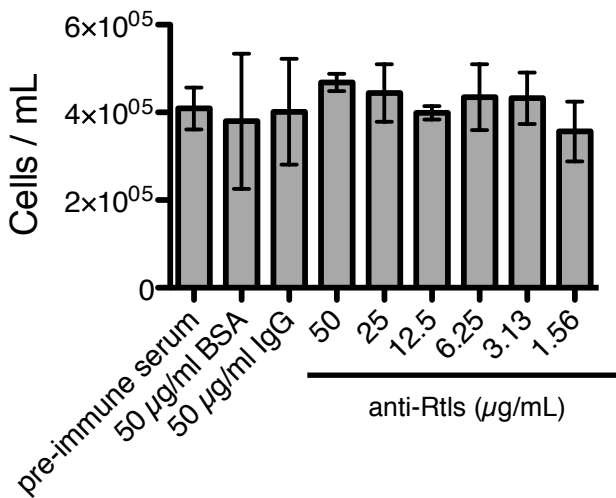

Supplement: supp [file elife_poa_e04070_Fig6_Figure_Supplement_1.pdf › elife_poa_e04070_Fig6_Figure_Supplement_1.pdf]

**A**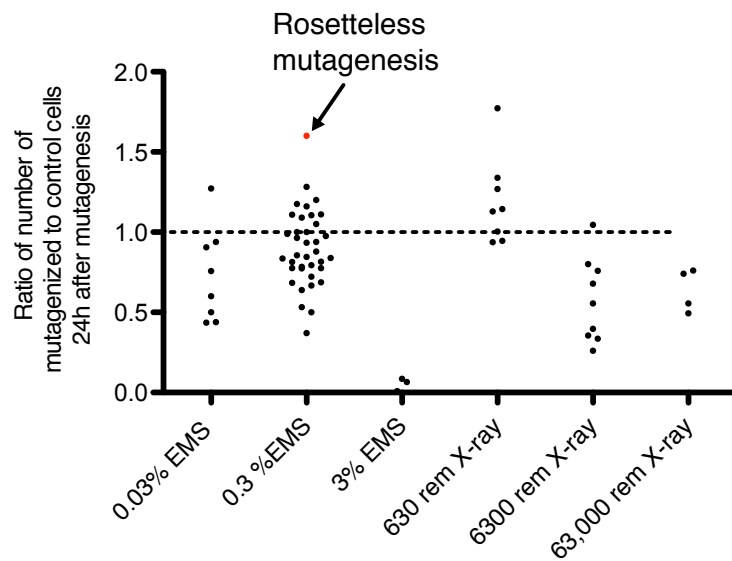**B**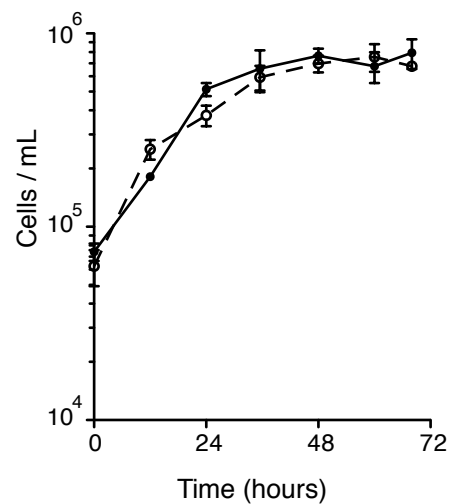**C**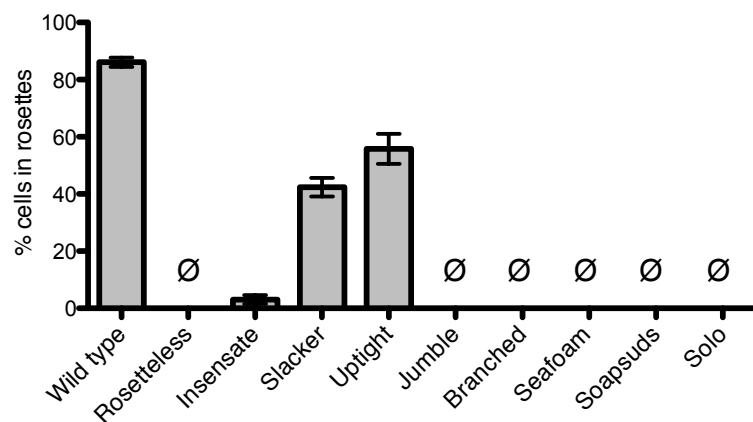**D**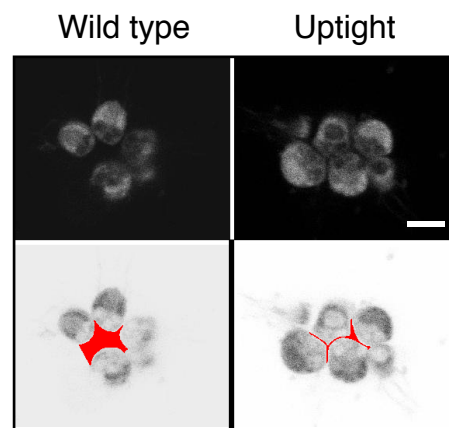**E**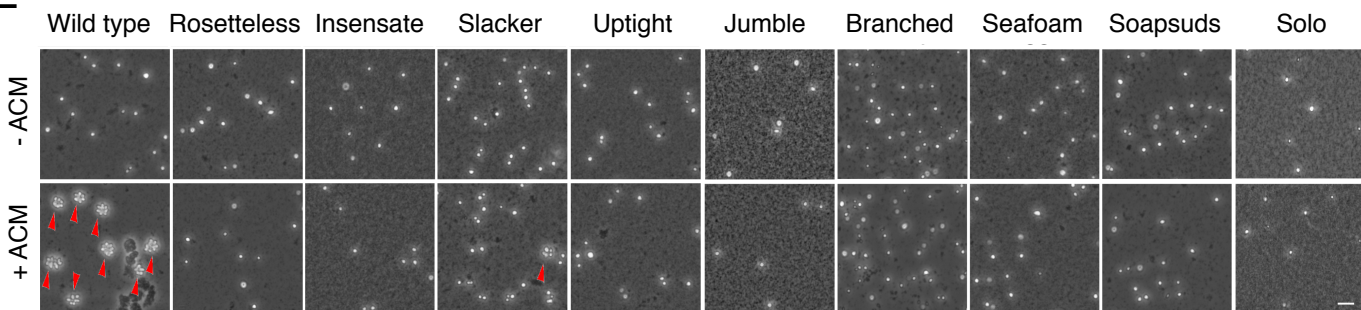

Supplement: supp [file elife_poa_e04070_Fig_3_Figure_Supplement_1.pdf › elife_poa_e04070_Fig_3_Figure_Supplement_1.pdf]

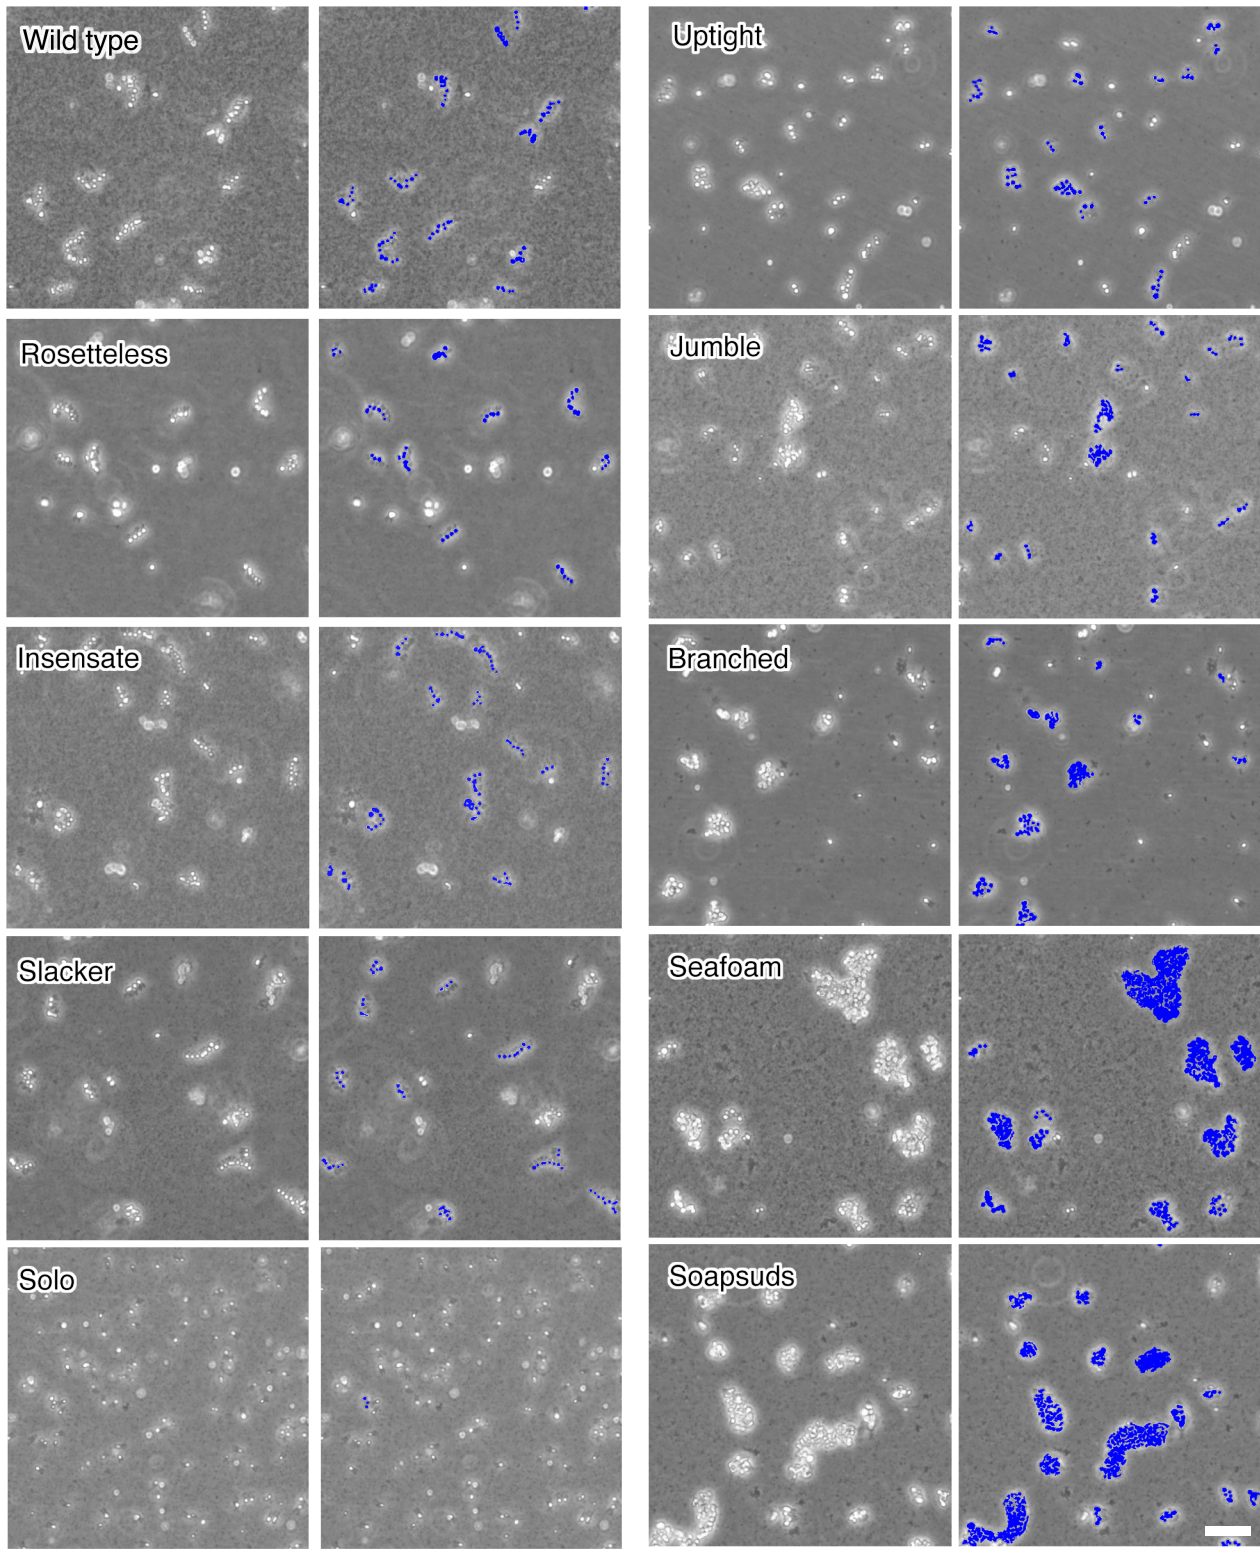

Supplement: supp [file elife_poa_e04070_Fig_3_Figure_Supplement_2.pdf › elife_poa_e04070_Fig_3_Figure_Supplement_2.pdf]

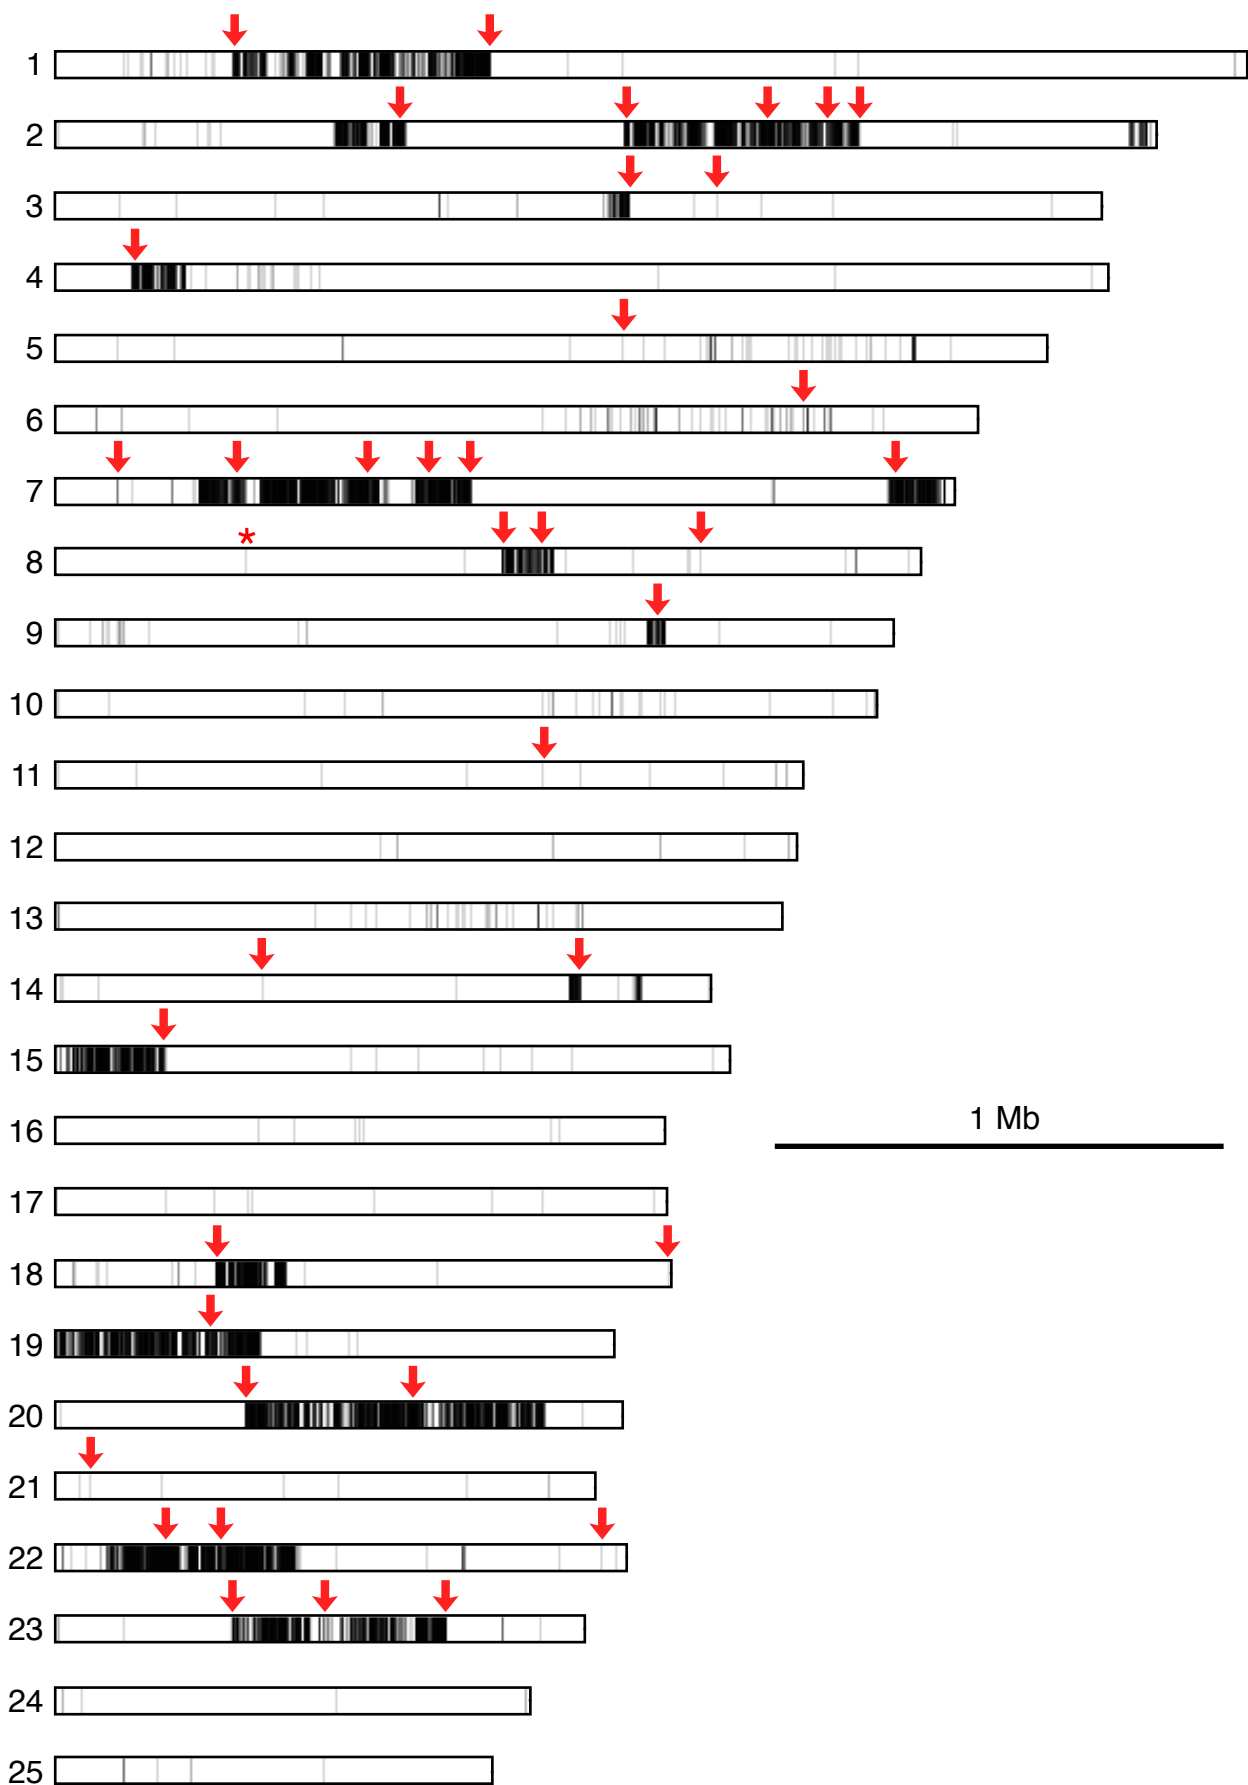

Supplement: supp [file elife_poa_e04070_Fig_4_Figure_Supplement_2.pdf › elife_poa_e04070_Fig_4_Figure_Supplement_2.pdf]

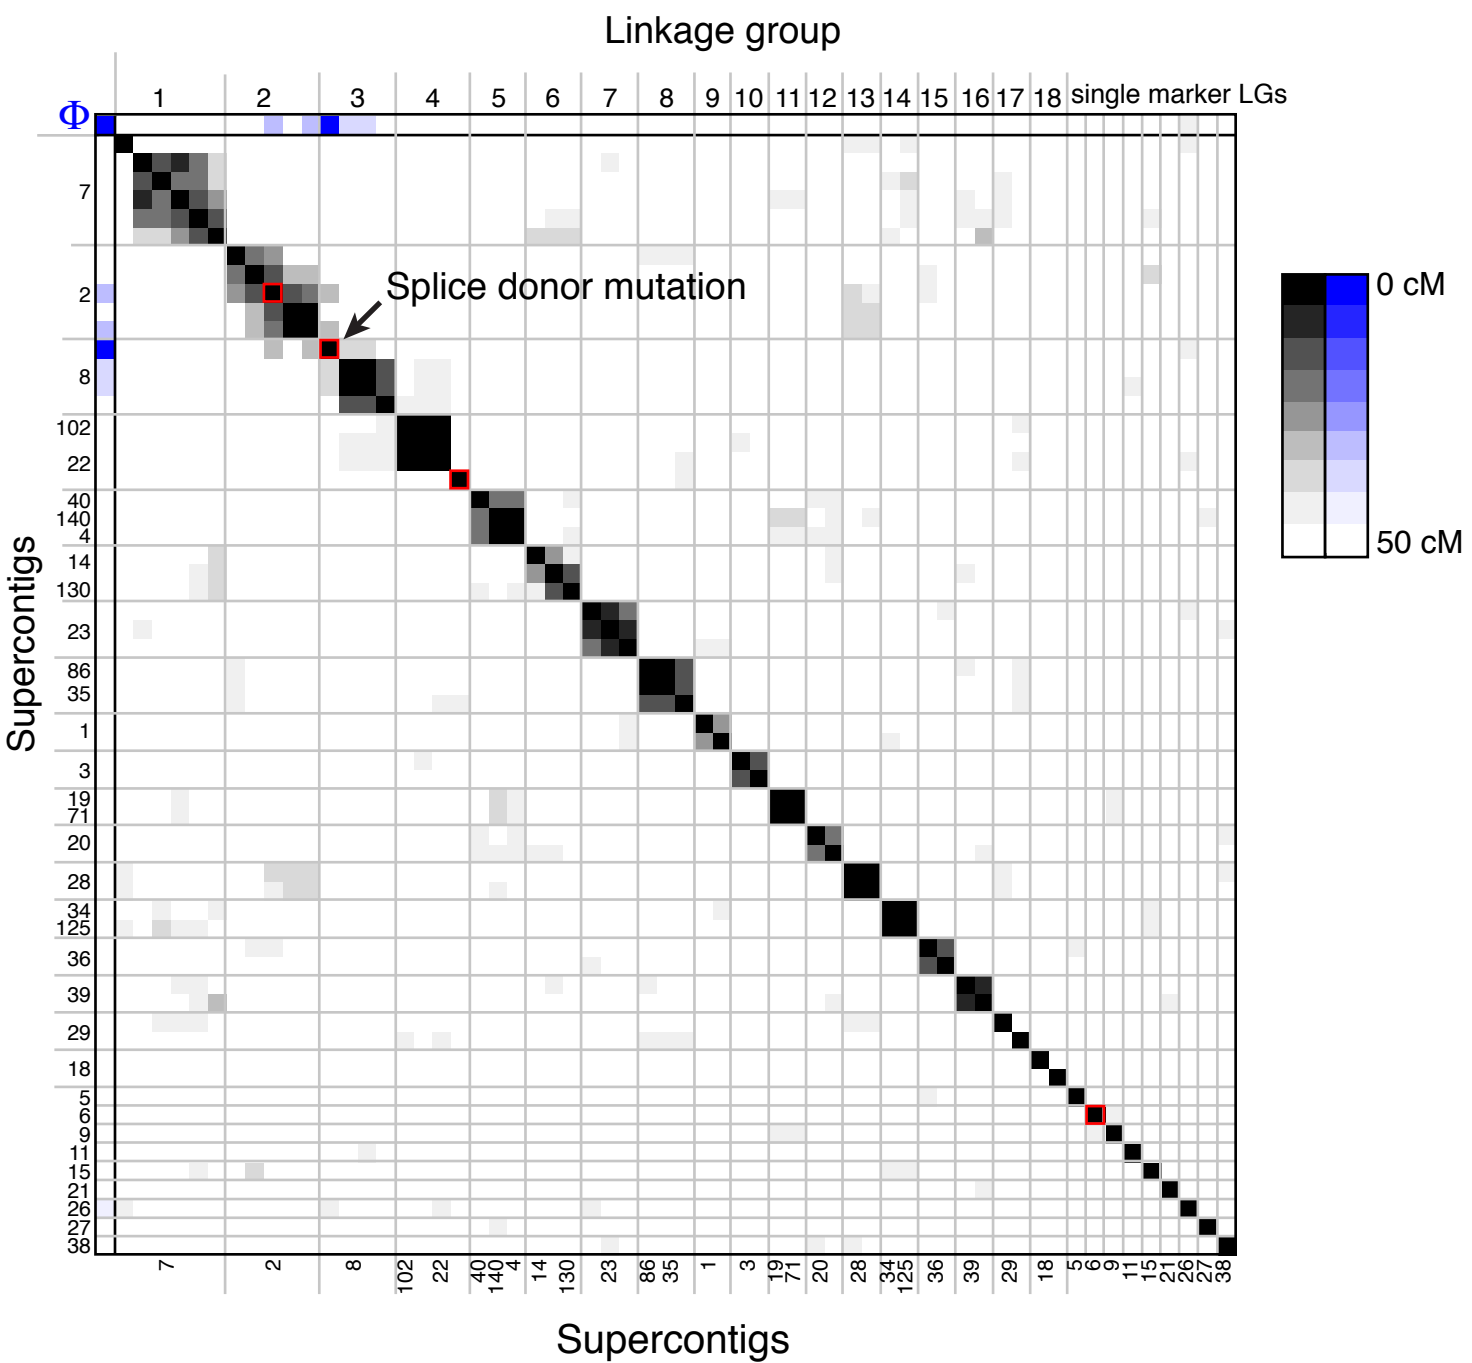

Supplement: supp [file elife_poa_e04070_Fig_4_Figure_Supplement_3.pdf › elife_poa_e04070_Fig_4_Figure_Supplement_3.pdf]

**A**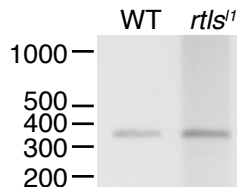**C**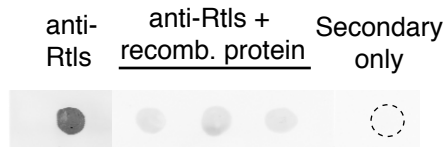**B**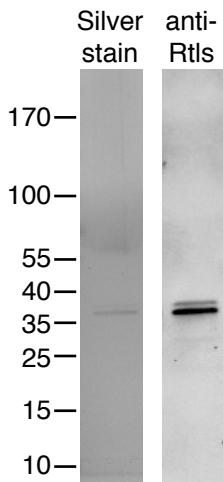**D**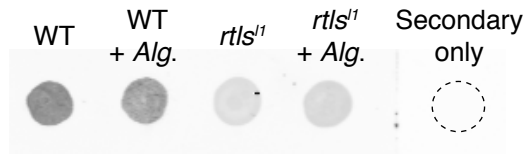

Supplement: supp [file elife_poa_e04070_Fig_5_Figure_Supplement_1.pdf › elife_poa_e04070_Fig_5_Figure_Supplement_1.pdf]

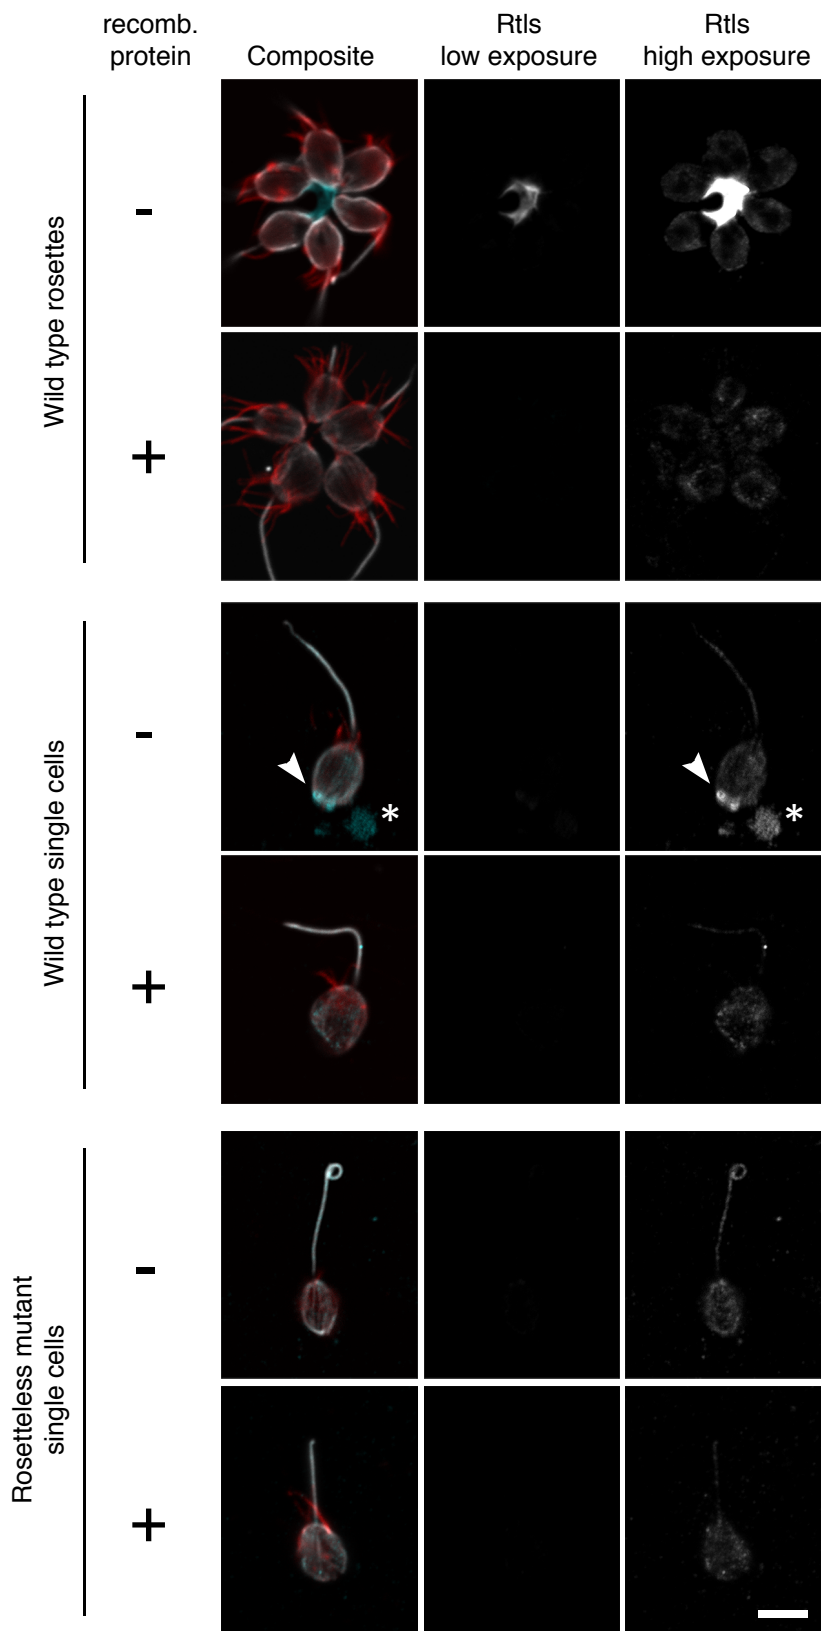

Supplement: supp [file elife_poa_e04070_Fig_6_Figure_Supplement_2.pdf › elife_poa_e04070_Fig_6_Figure_Supplement_2.pdf]
